# Supplementary material for: Genomic Epidemiology of Vancomycin-Resistant Enterococcus faecium (VREfm) in Latin America: Revisiting The Global VRE Population Structure
Source: PubMed Central journal article supplement (PMC7101424; doi:10.1038/s41598-020-62371-7), 2020-03-27
Supplement: 41598_2020_62371_MOESM1_ESM.pdf [file 41598_2020_62371_MOESM1_ESM.pdf]

**Supplementary material: Genomic Epidemiology of Vancomycin-Resistant *Enterococcus faecium* (VRE<sub>fm</sub>) in Latin America: Revisiting The Global VRE Population Structure**

Rafael Rios<sup>1</sup>, Jinnethe Reyes<sup>1,2</sup>, Lina P. Carvajal<sup>1</sup>, Sandra Rincon<sup>1</sup>, Diana Panesso<sup>1,2,3</sup>, Aura M. Echeverri<sup>1</sup>, An Dinh<sup>2,3</sup>, Sergios-Orestis Kolokotronis<sup>4,5</sup>, Apurva Narechania<sup>4</sup>, Truc T. Tran<sup>2,3</sup>, Jose M. Munita<sup>2,3,6,7</sup>, Barbara E. Murray<sup>2,3,9</sup>, Paul J. Planet<sup>4,8</sup>, Cesar A. Arias<sup>1,2,3,6,9</sup> and Lorena Diaz<sup>1,2,6\*</sup>

\*Correspondence

Lorena Diaz, PhD

Molecular Genetics and Antimicrobial Resistance Unit, International Center for Microbial Genomics, Universidad El Bosque

Av Cra 9 131a-02, Bogotá, Colombia.

Tel: 57 6489000 ext 1131

email: [diazsandra@unbosque.edu.co](mailto:diazsandra@unbosque.edu.co)

**Supplementary Table 1.** List of *E. faecium* genomes included in the analysis

| <b>GENOME</b>       | <b>SOURCE CATEGORY</b>     | <b>SOURCE</b>         | <b>COUNTRY</b> | <b>YEAR</b> | <b>ST</b> | <b>SUBCLADE</b> | <b>ACCESSION</b> |
|---------------------|----------------------------|-----------------------|----------------|-------------|-----------|-----------------|------------------|
| <b>ICIS96</b>       | Animal                     | <i>Equus caballus</i> | Russia         | 2014        | 47        | Animal branches | NNSQ01           |
| <b>E1630</b>        | Other                      | River water           | Netherlands    | 1981        | 69        | Animal branches | AH XK01          |
| <b>E3346</b>        | Hospitalized patient       | Human - Blood         | Netherlands    | 2002        | 69        | Animal branches | AHYA01           |
| <b>E0679</b>        | Animal                     | Pig                   | Belgium        | 1995        | 150       | Animal branches | AHWM01           |
| <b>E0680</b>        | Animal                     | Pig                   | Germany        | 1995        | 151       | Animal branches | AHWN01           |
| <b>9930238_2</b>    | Animal                     | Pig feces             | Denmark        | 1999        | 133       | Animal branches | AITJ01           |
| <b>841V03</b>       | Animal                     | Pig feces             | Denmark        | 2003        | 147       | Animal branches | AISU01           |
| <b>E0688</b>        | Animal                     | Pig                   | Spain          | 1995        | 5         | Animal branches | AHWO01           |
| <b>HF50104</b>      | Animal                     | Pig                   | USA            | 2008        | 5         | Animal branches | AITR01           |
| <b>E1552</b>        | Hospitalized patient feces | Human feces           | Netherlands    | 2002        | 5         | Animal branches | AHWW01           |
| <b>1_EFCM_CA_NL</b> | Hospitalized patient feces | Human feces           | Netherlands    | 2012        | 6         | Animal branches | NXOY01           |
| <b>E8SV3</b>        | Animal                     | Pig feces             | Denmark        | 1995        | 6         | Animal branches | AITM01           |
| <b>7430166_3</b>    | Animal                     | Pig feces             | Denmark        | 2002        | 6         | Animal branches | AIST01           |
| <b>9730219_1</b>    | Animal                     | Pig feces             | Denmark        | 1997        | 6         | Animal branches | AISY01           |

|                    |                      |                         |             |      |         |                 |        |
|--------------------|----------------------|-------------------------|-------------|------|---------|-----------------|--------|
| <b>7330519_3</b>   | Animal               | Pig feces               | Denmark     | 2001 | 6       | Animal branches | AISQ01 |
| <b>9830091_5</b>   | Animal               | Pig feces               | Denmark     | 1998 | 6       | Animal branches | AITC01 |
| <b>HF50106</b>     | Animal               | Pig feces               | USA         | 2008 | 6       | Animal branches | AITT01 |
| <b>7230532_1</b>   | Animal               | Pig feces               | Denmark     | 2000 | New ST  | Animal branches | AISN01 |
| <b>A17SV1</b>      | Animal               | Pig feces               | Denmark     | 1995 | 6       | Animal branches | AITL01 |
| <b>IQ110</b>       | Other                | Cheese                  | Argentina   | 2011 | SLV-52  | Animal branches | LKPG01 |
| <b>1231501</b>     | Hospitalized patient | Human - Blood           | USA         | 2005 | 52      | Animal branches | ACAY01 |
| <b>E1258</b>       | Hospitalized patient | Human - Blood           | Spain       | 1998 | 127     | Animal branches | AHWT01 |
| <b>5209</b>        | Other                | Chicken carcass rinse   | USA         | 2003 | 54      | Animal branches | NSDA01 |
| <b>7C8_DIV0219</b> | Animal               | Marmot feces            | Afghanistan | 2015 | New ST  | Animal branches | NGKZ01 |
| <b>F1213D01</b>    | Animal               | <i>Bos taurus</i> feces | Canada      | 2004 | SLV-955 | Animal branches | MJDZ01 |
| <b>D</b>           | Other                | Cheese                  | Mexico      | 2008 | 1046    | Animal branches | MEGX01 |
| <b>VAN335</b>      | Animal               | Chicken feces           | Denmark     | 2010 | 417     | Animal branches | AIUZ01 |
| <b>E2071</b>       | Animal               | Poultry                 | Denmark     | 2001 | 27      | Animal branches | AHXT01 |
| <b>E1574</b>       | Animal               | Dog                     | Belgium     | 1995 | 27      | Animal branches | AHWY01 |
| <b>E0120</b>       | Hospitalized patient | Human - Ascites         | Netherlands | 1995 | 27      | Animal branches | AHWI01 |

|                     |                      |                                                 |                |      |        |                 |                                      |
|---------------------|----------------------|-------------------------------------------------|----------------|------|--------|-----------------|--------------------------------------|
| <b>E1185</b>        | Hospitalized patient | Human - Blood                                   | France         | 1998 | 26     | Animal branches | AHWS01                               |
| <b>E1679</b>        | Hospitalized patient | Human - Vascular catheter                       | Brazil         | 1998 | 114    | Animal branches | ABSC01                               |
| <b>10_96A</b>       | Hospitalized patient | Human - Blood                                   | Brazil         | 1996 | 281    | Animal branches | AXOL01                               |
| <b>E1904</b>        | Hospitalized patient | Human - Urine                                   | Netherlands    | 2001 | 210    | Animal branches | AHXQ01                               |
| <b>E2134</b>        | Animal               | Chicken                                         | Netherlands    | 2004 | 12     | Animal branches | AHXU01                               |
| <b>LS170308</b>     | Animal               | Forest musk deer ( <i>Moschus berezovskii</i> ) | China          | 2017 | 30     | Animal branches | chromosome: NZ_CP025077.1/CP025077.1 |
| <b>FDAARGOS_374</b> | Hospitalized patient | Human - Skin swab                               | USA            | 2015 | New ST | Animal branches | PDFH01                               |
| <b>7527</b>         | Other                | Chicken carcass rinse                           | USA            | 2003 | 269    | Animal branches | NSDB01                               |
| <b>E0269</b>        | Animal               | Turkey feces                                    | Netherlands    | 1996 | 9      | Animal branches | AHWK01                               |
| <b>E1620</b>        | Hospitalized patient | Human - Blood                                   | Netherlands    | 1957 | 67     | Animal branches | AHXF01                               |
| <b>E0045</b>        | Animal               | Chicken feces                                   | United Kingdom | 1992 | 9      | Animal branches | AHWH01                               |
| <b>E1575</b>        | Animal               | Chicken                                         | Belgium        | 1995 | 158    | Animal branches | AHWZ01                               |
| <b>E0164</b>        | Animal               | Turkey feces                                    | Netherlands    | 1996 | 26     | Animal branches | AHWJ01                               |
| <b>F9730129_1</b>   | Animal               | Chicken                                         | Denmark        | 1997 | 245    | Animal branches | AITN01                               |
| <b>E4215</b>        | Animal               | Chicken                                         | Sweden         | 2004 | 310    | Animal branches | AHYE01                               |

|                     |                            |                                  |             |      |     |                 |                                      |
|---------------------|----------------------------|----------------------------------|-------------|------|-----|-----------------|--------------------------------------|
| <b>2D4_DIV0473</b>  | Animal                     | Buzzard                          | Germany     | 2015 | 195 | Animal branches | NGLQ01                               |
| <b>615</b>          | Other                      | Environmental - Playground slide | USA         | 2001 | 82  | Animal branches | NSDE01                               |
| <b>E1627</b>        | Hospitalized patient feces | Human feces                      | Netherlands | 1979 | 66  | Animal branches | AHXJ01                               |
| <b>97_6_S5</b>      | Hospitalized patient feces | Human feces                      | Chile       | 2015 | 822 | Animal branches | MRYG01                               |
| <b>WEFA23</b>       | Healthy Individual Feces   | Human - Healthy infants          | China       | 2015 | 66  | Animal branches | chromosome: CP021885.1               |
| <b>E1634</b>        | Other                      | River water                      | Netherlands | 1982 | 66  | Animal branches | AHXL01                               |
| <b>VAN345</b>       | Animal                     | Chicken feces                    | Denmark     | 2010 | 38  | Animal branches | AIVB01                               |
| <b>E4452</b>        | Animal                     | Dog feces                        | Netherlands | 2008 | 266 | Animal branches | AEOU01                               |
| <b>E1626</b>        | Hospitalized patient       | Human - Stomach fluid            | Netherlands | 1965 | 92  | Animal branches | AHXI01                               |
| <b>GL3</b>          | Animal                     | Dromedary milk                   | Algeria     | 2013 | 22  | Animal branches | LIHM01                               |
| <b>64_3</b>         | Healthy Individual Feces   | Human feces                      | Germany     | 1992 | 21  | Animal branches | chromosome: NZ_CP012522.1/CP012522.1 |
| <b>L_3</b>          | Other                      | Probiotic                        | Russia      | 2010 | 619 | Animal branches | JRGX01                               |
| <b>9B11_DIV0348</b> | Animal                     | Bird                             | Germany     | 2015 | 22  | Animal branches | NGKT01                               |
| <b>70_36_8</b>      | Animal                     | Pig                              | Denmark     | 2011 | 536 | Animal branches | JRUG01                               |
| <b>E1622</b>        | Animal                     | Mouse                            | Netherlands | 1959 | 104 | Animal branches | AHXG01                               |

|                     |                            |                                   |                |         |         |                 |           |
|---------------------|----------------------------|-----------------------------------|----------------|---------|---------|-----------------|-----------|
| <b>E1050</b>        | Healthy Individual Feces   | Non-hospitalized individual Feces | Netherlands    | 1998    | 92      | Animal branches | AHWQ01    |
| <b>NCTC13169</b>    | Hospitalized patient       | Human - Blood                     | United Kingdom | c. 1982 | 71      | Animal branches | ERR375583 |
| <b>NCTC7380</b>     | Hospitalized patient       | Human - Blood                     | United Kingdom | ≤ 1946  | 32      | Animal branches | ERR375572 |
| <b>E1071</b>        | Hospitalized patient feces | Human feces                       | Netherlands    | 2000    | 32      | Animal branches | ABQI01    |
| <b>ATCC8459</b>     | Other                      | Cheese                            | USA            | 1972    | 860     | Animal branches | AJAJ01    |
| <b>CRL1879</b>      | Other                      | Cheese                            | Argentina      | 2011    | New ST  | Animal branches | AOUK01    |
| <b>11B6_DIV0698</b> | Animal                     | Mollusc                           | USA            | 2013    | DLV-304 | Animal branches | NGMC01    |
| <b>E1573</b>        | Animal                     | Turkey feces                      | Netherlands    | 1996    | 21      | Animal branches | AHWX01    |
| <b>E1576</b>        | Animal                     | Ostrich caecum                    | South Africa   | 2001    | 159     | Animal branches | AHXA01    |
| <b>E1623</b>        | Hospitalized patient       | Human - Pus                       | Netherlands    | 1960    | 22      | Animal branches | AHXH01    |
| <b>NCTC7171</b>     | Hospitalized patient       | Human - Blood                     | United Kingdom | ≤ 1946  | 160     | Animal branches | ERR375571 |
| <b>LCT_EF128</b>    | Hospitalized patient       | Human - Bronchoalveolar lavage    | China          | 2011    | 160     | Animal branches | AJUP01    |
| <b>E1578</b>        | Animal                     | Pig feces                         | Germany        | 2001    | 160     | Animal branches | AHXB01    |
| <b>471</b>          | Hospitalized patient       | Human - Blood                     | Russia         | 2016    | SLV-168 |                 | PDFM01    |
| <b>993</b>          | Hospitalized patient       | Human - Wound                     | Russia         | 2015    | SLV-168 |                 | PDLZ01    |

|                     |                            |                          |                |      |         |                     |                           |
|---------------------|----------------------------|--------------------------|----------------|------|---------|---------------------|---------------------------|
| <b>E161</b>         | Hospitalized patient       | Human - Urine            | China          | 2013 | 414     |                     | JXZA01                    |
| <b>E31</b>          | Hospitalized patient       | Human - Bile             | China          | 2013 | 572     |                     | JYCO01                    |
| <b>SC4</b>          | Other                      | Fodder                   | China          | 2016 | 78      |                     | chromosome:CP02542<br>5.1 |
| <b>BSAC_EC2783</b>  | Hospitalized patient       | Human - Blood            | United Kingdom | 2011 | 412     | Clinical subclade I | ERR374675                 |
| <b>ERV144</b>       | Hospitalized patient       | Human - Blood            | Peru           | 2007 | 494     | Clinical subclade I | AMAK01                    |
| <b>ERV180</b>       | Hospitalized patient       | Human Pleural liquid     | Colombia       | 2010 | 656     | Clinical subclade I | MJFF00000000              |
| <b>MRSN3418</b>     | Hospitalized patient       | Human - Wound            | USA            | 2011 | 412     | Clinical subclade I | LBIM01                    |
| <b>LIM1759</b>      | Hospitalized patient feces | Human feces              | Brazil         | 2014 | SLV-896 | Clinical subclade I | MVGJ01                    |
| <b>LIM1590</b>      | Hospitalized patient feces | Human feces              | Brazil         | 2013 | 963     | Clinical subclade I | MVGG01                    |
| <b>LIM1546</b>      | Hospitalized patient feces | Human - Rectal swap      | Brazil         | 2013 | 896     | Clinical subclade I | MVGO01                    |
| <b>LIM1586</b>      | Hospitalized patient feces | Human feces              | Brazil         | 2013 | 896     | Clinical subclade I | MVGF01                    |
| <b>LIM918</b>       | Hospitalized patient feces | Human feces              | Brazil         | 2012 | 896     | Clinical subclade I | MVGE01                    |
| <b>LIM4247</b>      | Hospitalized patient feces | Human feces              | Brazil         | 2014 | 896     | Clinical subclade I | MVGH01                    |
| <b>LIM1530</b>      | Hospitalized patient feces | Human - Rectal swap      | Brazil         | 2013 | 896     | Clinical subclade I | MVGD01                    |
| <b>IHC2</b>         | Hospitalized patient       | Human - Blood            | USA            | 2013 | 664     | Clinical subclade I | MSHR01                    |
| <b>FDAARGOS_326</b> | Hospitalized patient feces | Human - jejunal aspirate | USA            | 2015 | 736     | Clinical subclade I | POVW01                    |

|                     |                            |                        |                |      |         |                     |                                             |
|---------------------|----------------------------|------------------------|----------------|------|---------|---------------------|---------------------------------------------|
| <b>E39</b>          | Hospitalized patient       | Human - Blood          | USA            | 2009 | 736     | Clinical subclade I | chromosome:<br>NZ_CP011281.1/<br>CP011281.1 |
| <b>ISMMS_VRE_10</b> | Hospitalized patient       | Human - Blood          | USA            | 2011 | 736     | Clinical subclade I | chromosome:<br>NZ_CP012471.1/<br>CP012471.1 |
| <b>ER04120.3A</b>   | Hospitalized patient       | Human - Blood          | USA            | 2015 | 736     | Clinical subclade I | chromosome:<br>CP023784.1                   |
| <b>ER03933.3A</b>   | Hospitalized patient       | Human - Blood          | USA            | 2015 | 736     | Clinical subclade I | chromosome:<br>CP023780.1                   |
| <b>ISMMS_VRE_5</b>  | Hospitalized patient       | Human - Blood          | USA            | 2011 | 736     | Clinical subclade I | chromosome:<br>NZ_CP012454.1/<br>CP012454.1 |
| <b>E240</b>         | Hospitalized patient       | Human - Uterus cancer  | USA            | 2013 | 736     | Clinical subclade I | chromosome:<br>NZ_CP017792.1/<br>CP017792.1 |
| <b>909_EFCM</b>     | Hospitalized patient       | Human - Urine          | USA            | 2012 | 736     | Clinical subclade I | JUOK01                                      |
| <b>702_EFCM</b>     | Hospitalized patient       | Human - Urine          | USA            | 2012 | 736     | Clinical subclade I | JUWL01                                      |
| <b>514_EFCM</b>     | Hospitalized patient       | Human - Urine          | USA            | 2012 | 736     | Clinical subclade I | JVEC01                                      |
| <b>377_EFCM</b>     | Hospitalized patient       | Human - Sputum induced | USA            | 2012 | 736     | Clinical subclade I | JVJM01                                      |
| <b>43_EFCM</b>      | Hospitalized patient       | Human - Blood          | USA            | 2012 | 736     | Clinical subclade I | JVHJ01                                      |
| <b>41_EFCM</b>      | Hospitalized patient       | Human - Blood          | USA            | 2012 | SLV-736 | Clinical subclade I | JVIG01                                      |
| <b>97_7_S6</b>      | Hospitalized patient feces | Human feces            | Chile          | 2015 | New ST  | Clinical subclade I | MRYH01                                      |
| <b>BSAC_EC2288</b>  | Hospitalized patient       | Human - Blood          | United Kingdom | 2010 | 78      | Clinical subclade I | ERR374760                                   |



|                      |                            |                       |                |      |      |                     |                                             |
|----------------------|----------------------------|-----------------------|----------------|------|------|---------------------|---------------------------------------------|
| <b>197806558</b>     | Hospitalized patient feces | Human feces           | Sweden         | 2014 | 192  | Clinical subclade I | LNLA01                                      |
| <b>VRE_1502382</b>   | Hospitalized patient feces | Human feces           | Sweden         | 2015 | 1489 | Clinical subclade I | LN0T01                                      |
| <b>VRE_1400136</b>   | Hospitalized patient feces | Human feces           | Sweden         | 2014 | 192  | Clinical subclade I | LNLL01                                      |
| <b>S_1402282</b>     | Hospitalized patient feces | Human feces           | Sweden         | 2014 | 192  | Clinical subclade I | LNLD01                                      |
| <b>E13931</b>        | Hospitalized patient feces | Human feces           | Sweden         | 2013 | 192  | Clinical subclade I | LNLB01                                      |
| <b>ERV223</b>        | Hospitalized patient       | Human - Blood         | Colombia       | 2011 | 17   | Clinical subclade I | MJFL00000000                                |
| <b>ERV218</b>        | Hospitalized patient feces | Human - Rectal swap   | Colombia       | 2011 | 17   | Clinical subclade I | MJFJ00000000                                |
| <b>2014_VREF_114</b> | Hospitalized patient feces | Human - Rectal swap   | South Korea    | 2014 | 1421 | Clinical subclade I | chromosome:<br>NZ_CP019970.1/<br>CP019970.1 |
| <b>2014_VREF_268</b> | Hospitalized patient feces | Human - Rectal swap   | South Korea    | 2015 | 1421 | Clinical subclade I | chromosome:<br>NZ_CP019992.1/<br>CP019992.1 |
| <b>EF_DMG1500501</b> | Hospitalized patient       | Human - No Data       | Australia      | 2014 | 1421 | Clinical subclade I | chromosome<br>1:LT603678.1                  |
| <b>VREF001</b>       | Hospitalized patient       | Human - Cholecystitis | United Kingdom | 2017 | 1424 | Clinical subclade I | PJZU01                                      |
| <b>VREF005</b>       | Hospitalized patient       | Human - Colon cancer  | United Kingdom | 2017 | 1424 | Clinical subclade I | PJZQ01                                      |
| <b>VREF004</b>       | Hospitalized patient       | Human - Colon cancer  | United Kingdom | 2017 | 1424 | Clinical subclade I | PJZR01                                      |
| <b>VREF002</b>       | Hospitalized patient       | Human - Cholecystitis | United Kingdom | 2017 | 1424 | Clinical subclade I | PJZT01                                      |
| <b>ERV242</b>        | Hospitalized patient       | Human - Urine         | Colombia       | 2012 | 412  | Clinical subclade I | MJFO00000000                                |

|                    |                            |                          |                |      |         |                     |                                             |
|--------------------|----------------------------|--------------------------|----------------|------|---------|---------------------|---------------------------------------------|
| <b>ERV237</b>      | Hospitalized patient feces | Human feces              | Colombia       | 2012 | 412     | Clinical subclade I | MJFN00000000                                |
| <b>K59_68</b>      | Hospitalized patient       | Human - Blood            | Norway         | 2008 | 203     | Clinical subclade I | NMZH01                                      |
| <b>BSAC_EC2041</b> | Hospitalized patient       | Human - Blood            | United Kingdom | 2009 | 203     | Clinical subclade I | ERR375174                                   |
| <b>ERV251</b>      | Hospitalized patient       | Human - Osteomyelitis    | Colombia       | 2013 | 412     | Clinical subclade I | MJFP00000000                                |
| <b>U_1313438</b>   | Hospitalized patient feces | Human feces              | Sweden         | 2013 | DLV-203 | Clinical subclade I | LNLE01                                      |
| <b>S_1001508</b>   | Hospitalized patient feces | Human feces              | Sweden         | 2010 | SLV-192 | Clinical subclade I | LNLC01                                      |
| <b>VRE1044</b>     | Hospitalized patient       | Human - Blood            | Sweden         | 2007 | 192     | Clinical subclade I | JAAL01                                      |
| <b>VRE1261</b>     | Hospitalized patient       | Human - Blood            | Sweden         | 2008 | SLV-192 | Clinical subclade I | JAAM01                                      |
| <b>C309</b>        | Hospitalized patient       | Human - Peritoneal fluid | China          | 2006 | 78      | Clinical subclade I | AJTW01                                      |
| <b>XH877</b>       | Hospitalized patient feces | Human feces              | China          | 2012 | 203     | Clinical subclade I | LXWZ01                                      |
| <b>VRE16</b>       | Hospitalized patient       | Human - Endocarditis     | Brazil         | 2009 | 412     | Clinical subclade I | LSYW01                                      |
| <b>ISMMS_VRE_2</b> | Hospitalized patient       | Human - Blood            | USA            | 2011 | 656     | Clinical subclade I | chromosome:<br>NZ_CP012436.1/<br>CP012436.1 |
| <b>LIM559</b>      | Hospitalized patient feces | Human feces              | Brazil         | 2008 | 412     | Clinical subclade I | MXAS01                                      |
| <b>AUS0085</b>     | Hospitalized patient       | Human - Blood            | Australia      | 2009 | 203     | Clinical subclade I | chromosome:<br>NC_021994.1/<br>CP006620.1   |
| <b>E6012</b>       | Hospitalized patient feces | Human - Rectal swap      | Latvia         | 2010 | 78      | Clinical subclade I | AHYK01                                      |

|                    |                            |                                  |                |      |     |                     |              |
|--------------------|----------------------------|----------------------------------|----------------|------|-----|---------------------|--------------|
| <b>BSAC_EC1359</b> | Hospitalized patient       | Human - Blood                    | United Kingdom | 2006 | 78  | Clinical subclade I | ERR374663    |
| <b>E6045</b>       | Hospitalized patient feces | Human - Rectal swap              | Portugal       | 2010 | 78  | Clinical subclade I | AHYL01       |
| <b>4686</b>        | Hospitalized patient       | Human - Blood                    | Russia         | 2009 | 192 | Clinical subclade I | MQRF01       |
| <b>24</b>          | Hospitalized patient feces | Human feces                      | Russia         | 2012 | 78  | Clinical subclade I | PDMA01       |
| <b>24_10</b>       | Hospitalized patient       | Human - Wound Infection          | Russia         | 2011 | 78  | Clinical subclade I | MVEB01       |
| <b>U0317</b>       | Hospitalized patient       | Human - Urinary tract infection  | Netherlands    | 2005 | 78  | Clinical subclade I | ABSW01       |
| <b>E2560</b>       | Hospitalized patient       | Human - Blood                    | Netherlands    | 2006 | 78  | Clinical subclade I | AHYI01       |
| <b>ERV161</b>      | Hospitalized patient       | Human - Blood                    | Colombia       | 2008 | 203 | Clinical subclade I | AMAW01       |
| <b>1231502</b>     | Hospitalized patient       | Human - Blood                    | USA            | 2005 | 203 | Clinical subclade I | ACAX01       |
| <b>ERV108</b>      | Hospitalized patient       | Human - Urine                    | Ecuador        | 2006 | 203 | Clinical subclade I | AMAZ01       |
| <b>ERV98</b>       | Hospitalized patient       | Human - Blood                    | Colombia       | 2005 | 412 | Clinical subclade I | MJFY00000000 |
| <b>ERV89</b>       | Hospitalized patient       | Human - Bronchial secretion      | Colombia       | 2005 | 412 | Clinical subclade I | MTRT00000000 |
| <b>ERV114</b>      | Hospitalized patient       | Human - Peritoneal liquid        | Colombia       | 2006 | 412 | Clinical subclade I | AMBB01       |
| <b>ERV102</b>      | Hospitalized patient       | Human - Sputum                   | Colombia       | 2006 | 412 | Clinical subclade I | AMAX01       |
| <b>ERV168</b>      | Hospitalized patient       | Human - Surgical wound secretion | Colombia       | 2009 | 412 | Clinical subclade I | AMAU01       |

|                  |                            |                           |          |      |         |                     |              |
|------------------|----------------------------|---------------------------|----------|------|---------|---------------------|--------------|
| <b>ERV172</b>    | Hospitalized patient       | Human - No data           | Colombia | 2009 | 412     | Clinical subclade I | MJFB00000000 |
| <b>ERV220</b>    | Hospitalized patient       | Human - No data           | Colombia | 2011 | 412     | Clinical subclade I | MJFK00000000 |
| <b>ERV174</b>    | Hospitalized patient       | Human - Peritoneal liquid | Colombia | 2009 | 412     | Clinical subclade I | MJFC00000000 |
| <b>ERV177</b>    | Hospitalized patient feces | Human - Rectal swap       | Colombia | 2010 | 412     | Clinical subclade I | MJFE00000000 |
| <b>805447_07</b> | Hospitalized patient       | Human - Pleura effusion   | Austria  | 2007 | 412     | Clinical subclade I | LQRS01       |
| <b>IHC11</b>     | Hospitalized patient       | Human - Blood             | USA      | 2007 | 584     | Clinical subclade I | MSIB01       |
| <b>10_131</b>    | Hospitalized patient       | Human - Catheter          | France   | 2010 | 412     | Clinical subclade I | PHKY01       |
| <b>967_EFCM</b>  | Hospitalized patient       | Human - Wound             | USA      | 2012 | 412     | Clinical subclade I | JULR01       |
| <b>964_EFCM</b>  | Hospitalized patient       | Human - Fluid             | USA      | 2012 | 412     | Clinical subclade I | JULU01       |
| <b>990_EFCM</b>  | Hospitalized patient       | Human - Fluid             | USA      | 2012 | 412     | Clinical subclade I | JUKT01       |
| <b>LIM716</b>    | Hospitalized patient feces | Human feces               | Brazil   | 2008 | DLV-478 | Clinical subclade I | MVGL01       |
| <b>LIM1547</b>   | Hospitalized patient feces | Human - Rectal swap       | Brazil   | 2013 | 478     | Clinical subclade I | MVGP01       |
| <b>LIM554</b>    | Hospitalized patient       | Human - Blood             | Brazil   | 2008 | 412     | Clinical subclade I | MVGM01       |
| <b>LIM563</b>    | Hospitalized patient feces | Human feces               | Brazil   | 2009 | 412     | Clinical subclade I | MVGK01       |
| <b>LIM699</b>    | Hospitalized patient       | Human - Blood             | Brazil   | 2006 | 412     | Clinical subclade I | MXAU01       |
| <b>LIM695</b>    | Hospitalized patient       | Human - Blood             | Brazil   | 2006 | 478     | Clinical subclade I | MXAT01       |

|                    |                            |                                  |                |      |         |                      |              |
|--------------------|----------------------------|----------------------------------|----------------|------|---------|----------------------|--------------|
| <b>ERV124</b>      | Hospitalized patient       | Human - Surgical wound secretion | Peru           | 2007 | 412     | Clinical subclade I  | AMAM01       |
| <b>IHC8</b>        | Hospitalized patient       | Human - Blood                    | USA            | 2007 | 412     | Clinical subclade I  | MSHY01       |
| <b>IHC13</b>       | Hospitalized patient       | Human - Blood                    | USA            | 2006 | 412     | Clinical subclade I  | MSID01       |
| <b>ERV133</b>      | Hospitalized patient       | Human - Urine                    | Venezuela      | 2007 | 412     | Clinical subclade I  | MJEY00000000 |
| <b>ERV118</b>      | Hospitalized patient       | Human - Blood                    | Venezuela      | 2006 | 412     | Clinical subclade I  | MTRU00000000 |
| <b>ERV115</b>      | Hospitalized patient       | Human - Surgical wound secretion | Venezuela      | 2006 | 412     | Clinical subclade I  | MTRV00000000 |
| <b>463_ANA</b>     | Hospitalized patient       | Human - Blood                    | USA            | 2015 | SLV-750 | Clinical subclade I  | NETE01       |
| <b>463_AER</b>     | Hospitalized patient       | Human - Blood                    | USA            | 2015 | 750     | Clinical subclade I  | NETD01       |
| <b>ERV175</b>      | Hospitalized patient       | Human - Urine                    | Colombia       | 2009 | 412     | Clinical subclade I  | MJFD00000000 |
| <b>ERV155</b>      | Hospitalized patient       | Human - Blood                    | Colombia       | 2008 | 412     | Clinical subclade I  | MJEZ00000000 |
| <b>ERV165</b>      | Hospitalized patient feces | Human feces                      | Colombia       | 2008 | 412     | Clinical subclade I  | AMAV01       |
| <b>ERV157</b>      | Hospitalized patient feces | Human feces                      | Colombia       | 2008 | 412     | Clinical subclade I  | MJFA00000000 |
| <b>ERV196</b>      | Hospitalized patient       | Human - Blood                    | Colombia       | 2010 | 412     | Clinical subclade I  | MJFH00000000 |
| <b>VRE_1502939</b> | Hospitalized patient feces | Human feces                      | Sweden         | 2015 | New ST  | Clinical subclade II | LNOW01       |
| <b>VRE2014_7</b>   | Hospitalized patient feces | Human - Rectal swap              | USA            | 2014 | New ST  | Clinical subclade II | NLCP01       |
| <b>VREN1625</b>    | Hospitalized patient       | Human - Blood                    | United Kingdom | 2015 | 80      | Clinical subclade II | FXHD01       |

|                     |                            |                      |                |      |        |                      |                                             |
|---------------------|----------------------------|----------------------|----------------|------|--------|----------------------|---------------------------------------------|
| <b>VREN1371</b>     | Hospitalized patient       | Human - Blood        | United Kingdom | 2015 | 80     | Clinical subclade II | FXHP01                                      |
| <b>ICBEF1B</b>      | Other                      | Seafood              | Brazil         | 2016 | 1336   | Clinical subclade II | NKYP01                                      |
| <b>LIM4275</b>      | Hospitalized patient feces | Human feces          | Brazil         | 2014 | 792    | Clinical subclade II | MVGI01                                      |
| <b>ET13_17</b>      | Hospitalized patient feces | Human - Rectal swap  | Brazil         | 2017 | New ST | Clinical subclade II | PEJX02                                      |
| <b>ET12_17</b>      | Hospitalized patient       | Human - Blood        | Brazil         | 2017 | New ST | Clinical subclade II | PEJV02                                      |
| <b>ET14_17</b>      | Hospitalized patient feces | Human - Rectal swap  | Brazil         | 2017 | New ST | Clinical subclade II | PEJY02                                      |
| <b>ERV190</b>       | Hospitalized patient       | Human - No data      | Colombia       | 2010 | 1517   | Clinical subclade II | MJFG00000000                                |
| <b>BSAC_EC1822</b>  | Hospitalized patient       | Human - Blood        | United Kingdom | 2008 | 412    | Clinical subclade II | ERR374884                                   |
| <b>BSAC_EC2499</b>  | Hospitalized patient       | Human - Blood        | United Kingdom | 2010 | 412    | Clinical subclade II | ERR374686                                   |
| <b>FDAARGOS_332</b> | Hospitalized patient feces | Human - Stool sample | USA            | 2015 | 17     | Clinical subclade II | NJFI02                                      |
| <b>VRE2014_195</b>  | Hospitalized patient feces | Human - Rectal swap  | USA            | 2014 | 17     | Clinical subclade II | NLCQ01                                      |
| <b>VRE2016_194</b>  | Hospitalized patient feces | Human - Rectal swap  | USA            | 2016 | 17     | Clinical subclade II | NLCT01                                      |
| <b>VRE001</b>       | Hospitalized patient       | Human - Blood        | USA            | 2013 | 203    | Clinical subclade II | chromosome:<br>NZ_CP018071.1/<br>CP018071.1 |
| <b>712_EFCM</b>     | Hospitalized patient       | Human - Urine        | USA            | 2012 | 412    | Clinical subclade II | JUWB01                                      |
| <b>969_EFCM</b>     | Hospitalized patient       | Human - Urine        | USA            | 2012 | 412    | Clinical subclade II | JULP01                                      |

|                     |                            |                         |                |      |     |                      |                                            |
|---------------------|----------------------------|-------------------------|----------------|------|-----|----------------------|--------------------------------------------|
| <b>BSAC_EC2198</b>  | Hospitalized patient       | Human - Blood           | United Kingdom | 2009 | 665 | Clinical subclade II | ERR374807                                  |
| <b>BSAC_EC1484</b>  | Hospitalized patient       | Human - Blood           | United Kingdom | 2006 | 665 | Clinical subclade II | ERR374754                                  |
| <b>1230933</b>      | Hospitalized patient       | Human - Blood           | USA            | 2005 | 18  | Clinical subclade II | ACAS01                                     |
| <b>ISMMS_VRE_11</b> | Hospitalized patient       | Human - Blood           | USA            | 2011 | 18  | Clinical subclade II | chromosome:<br>NZ_CP016163.1<br>CP016163.1 |
| <b>VRE2015_149</b>  | Hospitalized patient feces | Human - Rectal swap     | USA            | 2015 | 18  | Clinical subclade II | NLCR01                                     |
| <b>FDAARGOS_138</b> | Hospitalized patient feces | Human - Stool sample    | USA            | 2014 | 18  | Clinical subclade II | LORO02                                     |
| <b>MRSN11639</b>    | Hospitalized patient       | Human - Wound           | USA            | 2012 | 18  | Clinical subclade II | LBIN01                                     |
| <b>199_EFCM</b>     | Hospitalized patient       | Human - Blood           | USA            | 2012 | 18  | Clinical subclade II | JVQH01                                     |
| <b>999_EFCM</b>     | Hospitalized patient       | Human - Abdominal Fluid | USA            | 2012 | 18  | Clinical subclade II | JUKJ01                                     |
| <b>715_EFCM</b>     | Hospitalized patient       | Human - Urine           | USA            | 2012 | 18  | Clinical subclade II | JUVY01                                     |
| <b>704_EFCM</b>     | Hospitalized patient       | Human - Blood           | USA            | 2012 | 18  | Clinical subclade II | JUWJ01                                     |
| <b>VRE_1502913</b>  | Hospitalized patient feces | Human feces             | Sweden         | 2015 | 117 | Clinical subclade II | LNOV01                                     |
| <b>E2</b>           | Hospitalized patient       | Human - Urine           | Spain          | 2011 | 117 | Clinical subclade II | MPZY01                                     |
| <b>1250_EFCM</b>    | Hospitalized patient       | Human - Blood           | USA            | 2012 | 117 | Clinical subclade II | JVWZ01                                     |
| <b>1232_EFCM</b>    | Hospitalized patient       | Human - Blood           | USA            | 2012 | 117 | Clinical subclade II | JVXT01                                     |

|                    |                            |                                 |                |      |             |                      |                                         |
|--------------------|----------------------------|---------------------------------|----------------|------|-------------|----------------------|-----------------------------------------|
| <b>1238_EFCM</b>   | Hospitalized patient       | Human - Blood                   | USA            | 2012 | 117         | Clinical subclade II | JVXN01                                  |
| <b>97_3_S3</b>     | Hospitalized patient feces | Human feces                     | Chile          | 2015 | New ST      | Clinical subclade II | MRYF01                                  |
| <b>EF_AUS00233</b> | Healthy Individual Feces   | Human feces                     | Australia      | 2011 | 796         | Clinical subclade II | chromosome 1: NZ_LT598663.1/ LT598663.1 |
| <b>18434</b>       | Hospitalized patient       | Human - Blood                   | Russia         | 2012 | 78          | Clinical subclade II | PDFL01                                  |
| <b>ERS1122499</b>  | Hospitalized patient       | Human - Blood                   | Germany        | 2013 | 17          | Clinical subclade II | FKLC01                                  |
| <b>9_F_6</b>       | Hospitalized patient       | Human - Blood                   | Norway         | 2012 | 872         | Clinical subclade II | NMZI01                                  |
| <b>MRSN4777</b>    | Hospitalized patient       | Human - Wound                   | USA            | 2011 | No typeable | Clinical subclade II | LBIL01                                  |
| <b>560_EFCM</b>    | Hospitalized patient       | Human - Blood                   | USA            | 2012 | SLV-923     | Clinical subclade II | JVCC01                                  |
| <b>VRE1558</b>     | Hospitalized patient       | Human - Blood                   | Brazil         | 2013 | No typeable | Clinical subclade II | LBCV01                                  |
| <b>ERV280</b>      | Hospitalized patient       | Human - Urine                   | Colombia       | 2014 | 1516        | Clinical subclade II | MJFU00000000                            |
| <b>BSAC_EC1116</b> | Hospitalized patient       | Human - Blood                   | United Kingdom | 2005 | 202         | Clinical subclade II | ERR374680                               |
| <b>BSAC_EC2579</b> | Hospitalized patient       | Human - Blood                   | United Kingdom | 2011 | 117         | Clinical subclade II | ERR374756                               |
| <b>HPH2</b>        | Hospitalized patient       | Human - Urinary tract infection | Portugal       | 2007 | 125         | Clinical subclade II | MBRH01                                  |
| <b>E1731</b>       | Hospitalized patient       | Human - Blood                   | Tanzania       | 2002 | 18          | Clinical subclade II | AHXO01                                  |



|                    |                            |                    |                |      |      |                      |              |
|--------------------|----------------------------|--------------------|----------------|------|------|----------------------|--------------|
| <b>ERV275</b>      | Hospitalized patient       | Human - No data    | Mexico         | 2012 | 1304 | Clinical subclade II | MJFS00000000 |
| <b>BSAC_EC1179</b> | Hospitalized patient       | Human - Blood      | United Kingdom | 2005 | 1042 | Clinical subclade II | ERR374732    |
| <b>BSAC_EC1142</b> | Hospitalized patient       | Human - Blood      | United Kingdom | 2005 | 64   | Clinical subclade II | ERR374989    |
| <b>BSAC_EC1201</b> | Hospitalized patient       | Human - Blood      | United Kingdom | 2005 | 1477 | Clinical subclade II | ERR374823    |
| <b>BSAC_EC956</b>  | Hospitalized patient       | Human - Blood      | United Kingdom | 2004 | 1477 | Clinical subclade II | ERR375172    |
| <b>76</b>          | Hospitalized patient       | Human - Skin       | Russia         | 2014 | 80   | Clinical subclade II | PDNS01       |
| <b>97_19_S17</b>   | Hospitalized patient feces | Human feces        | Chile          | 2015 | 262  | Clinical subclade II | MRYE01       |
| <b>ERV279</b>      | Hospitalized patient       | Human - No data    | Mexico         | 2012 | 770  | Clinical subclade II | MJFT00000000 |
| <b>2E6_DIV0576</b> | Animal                     | Bird               | Germany        | 2015 | 80   | Clinical subclade II | NGLP01       |
| <b>93</b>          | Hospitalized patient       | Human - Skin       | Russia         | 2013 | 18   | Clinical subclade II | PDFN01       |
| <b>BSAC_EC1514</b> | Hospitalized patient       | Human - Blood      | United Kingdom | 2007 | 18   | Clinical subclade II | ERR374938    |
| <b>32</b>          | Hospitalized patient       | Human - Burn wound | Russia         | 2010 | 18   | Clinical subclade II | PDFP01       |
| <b>ST_18_K073</b>  | Hospitalized patient       | Human - Urine      | South Africa   | 2013 | 18   | Clinical subclade II | NXIX01       |
| <b>607_EFCM</b>    | Hospitalized patient       | Human - Fluid      | USA            | 2012 | 18   | Clinical subclade II | JVAH01       |
| <b>E2883</b>       | Hospitalized patient       | Human - Blood      | Netherlands    | 2002 | 18   | Clinical subclade II | AHXX01       |
| <b>BSAC_EC824</b>  | Hospitalized patient       | Human - Blood      | United Kingdom | 2004 | 18   | Clinical subclade II | ERR374662    |

|                     |                            |                                  |                |      |     |                      |           |
|---------------------|----------------------------|----------------------------------|----------------|------|-----|----------------------|-----------|
| <b>BSAC_EC1651</b>  | Hospitalized patient       | Human - Blood                    | United Kingdom | 2007 | 78  | Clinical subclade II | ERR374849 |
| <b>ERV122</b>       | Hospitalized patient       | Human - Surgical wound secretion | Peru           | 2007 | 18  | Clinical subclade II | AMAO01    |
| <b>ERV99</b>        | Hospitalized patient       | Human - Peritoneal liquid        | Colombia       | 2005 | 18  | Clinical subclade II | AMAQ01    |
| <b>ERV138</b>       | Hospitalized patient       | Human - Blood                    | Colombia       | 2007 | 18  | Clinical subclade II | AMBD01    |
| <b>ERV109</b>       | Hospitalized patient       | Human - Blood                    | Colombia       | 2006 | 18  | Clinical subclade II | AMBC01    |
| <b>E1321</b>        | Hospitalized patient       | Human - Catheter                 | Italy          | 1999 | 78  | Clinical subclade II | AHYF01    |
| <b>E4389</b>        | Animal                     | Dog feces                        | Denmark        | 2008 | 78  | Clinical subclade II | AHYJ01    |
| <b>E4453</b>        | Animal                     | Dog feces                        | Netherlands    | 2008 | 192 | Clinical subclade II | AEDZ01    |
| <b>FDAARGOS_331</b> | Hospitalized patient feces | Human - Stool sample             | USA            | 2015 | 18  | Clinical subclade II | POVX01    |
| <b>BSAC_EC832</b>   | Hospitalized patient       | Human - Blood                    | United Kingdom | 2004 | 186 | Clinical subclade II | ERR375187 |
| <b>E1133</b>        | Hospitalized patient feces | Human feces                      | USA            | 2001 | 117 | Clinical subclade II | AHWR01    |
| <b>1231408</b>      | Hospitalized patient       | Human - Blood                    | USA            | 2005 | 582 | Clinical subclade II | ACBB01    |
| <b>E0333</b>        | Hospitalized patient       | Human - Blood                    | Israel         | 1997 | 80  | Clinical subclade II | AHWL01    |
| <b>VRE2</b>         | Hospitalized patient       | Human - Blood                    | Malaysia       | 2011 | 80  | Clinical subclade II | LTAA01    |
| <b>VRER5</b>        | Hospitalized patient       | Human - Endocarditis             | Malaysia       | 2011 | 80  | Clinical subclade II | LTBJ01    |

|                    |                            |                                  |                |      |    |                      |                                             |
|--------------------|----------------------------|----------------------------------|----------------|------|----|----------------------|---------------------------------------------|
| <b>TX16_DO</b>     | Hospitalized patient       | Human - Blood                    | USA            | 1992 | 18 | Clinical subclade II | chromosome:<br>NC_017960.1/<br>CP003583.1   |
| <b>E1392</b>       | Hospitalized patient feces | Human feces                      | United Kingdom | 2000 | 64 | Clinical subclade II | AHWV01                                      |
| <b>NCTC12202</b>   | Hospitalized patient       | Human - Blood                    | United Kingdom | 1986 | 18 | Clinical subclade II | ERR375579                                   |
| <b>NCTC12204</b>   | Hospitalized patient       | Human - Blood                    | United Kingdom | 1986 | 18 | Clinical subclade II | ERR375585                                   |
| <b>ISMMS_VRE_8</b> | Hospitalized patient       | Human - Blood                    | USA            | 2011 | 17 | Clinical subclade II | chromosome:<br>NZ_CP012465.1/<br>CP012465.1 |
| <b>ERV281</b>      | Hospitalized patient       | Human - Blood                    | Colombia       | 2014 | 17 | Clinical subclade II | MJFV00000000                                |
| <b>ERV231</b>      | Hospitalized patient       | Human - Blood                    | Colombia       | 2012 | 17 | Clinical subclade II | MJFM00000000                                |
| <b>ERV212</b>      | Hospitalized patient       | Human - Blood                    | Colombia       | 2011 | 17 | Clinical subclade II | MTRX00000000                                |
| <b>ERV214</b>      | Hospitalized patient feces | Human feces                      | Colombia       | 2011 | 17 | Clinical subclade II | MJFI00000000                                |
| <b>ERV263</b>      | Hospitalized patient       | Human - Blood                    | Colombia       | 2013 | 17 | Clinical subclade II | MJFQ00000000                                |
| <b>ERV270</b>      | Hospitalized patient feces | Human feces                      | Colombia       | 2013 | 17 | Clinical subclade II | MJFR00000000                                |
| <b>ERV28</b>       | Hospitalized patient       | Human - Surgical wound secretion | Colombia       | 2001 | 17 | Clinical subclade II | MTRY00000000                                |
| <b>ERV35</b>       | Hospitalized patient       | Human - Blood                    | Colombia       | 2001 | 17 | Clinical subclade II | MJFX00000000                                |
| <b>ERV30</b>       | Hospitalized patient       | Human - Surgical wound secretion | Colombia       | 2001 | 17 | Clinical subclade II | MTRW00000000                                |
| <b>ERV26</b>       | Hospitalized patient       | Human - Pleural liquid           | Colombia       | 2001 | 17 | Clinical subclade II | AMAT01                                      |

|                |                            |                        |           |      |        |                      |                                           |
|----------------|----------------------------|------------------------|-----------|------|--------|----------------------|-------------------------------------------|
| <b>ERV34</b>   | Hospitalized patient       | Human - No data        | Colombia  | 2001 | 17     | Clinical subclade II | MJFW00000000                              |
| <b>ERV69</b>   | Hospitalized patient       | Human - Fistula        | Colombia  | 2005 | 17     | Clinical subclade II | AMAR01                                    |
| <b>ERV38</b>   | Hospitalized patient       | Human - No data        | Colombia  | 2002 | 17     | Clinical subclade II | AMAS01                                    |
| <b>TX0082</b>  | Hospitalized patient       | Human - Blood          | USA       | 1999 | 17     | Clinical subclade II | AEBU01                                    |
| <b>LIM714</b>  | Hospitalized patient feces | Human feces            | Brazil    | 2008 | New ST | Clinical subclade II | MVGN01                                    |
| <b>E1644</b>   | Hospitalized patient       | Human - Catheter-Urine | Germany   | 2002 | 78     | Clinical subclade II | AHYG01                                    |
| <b>E2369</b>   | Hospitalized patient       | Human - Wound          | Hungary   | 2005 | 78     | Clinical subclade II | AHYH01                                    |
| <b>E6</b>      | Hospitalized patient feces | Human feces            | Spain     | 2009 | 17     | Clinical subclade II | MQAC01                                    |
| <b>AUS0004</b> | Hospitalized patient       | Human - Blood          | Australia | 1998 | 17     | Clinical subclade II | chromosome:<br>NC_017022.1/<br>CP003351.1 |
| <b>E525</b>    | Hospitalized patient       | Human - Wound          | Australia | 1998 | 17     | Clinical subclade II | AUWV01                                    |
| <b>ERV121</b>  | Hospitalized patient       | Human - Blood          | Peru      | 2007 | 280    | Clinical subclade II | AMAP01                                    |
| <b>ERV123</b>  | Hospitalized patient       | Human - Urine          | Peru      | 2007 | 280    | Clinical subclade II | AMAN01                                    |
| <b>ERV125</b>  | Hospitalized patient       | Human - Blood          | Peru      | 2007 | 125    | Clinical subclade II | AMAL01                                    |
| <b>ERV113</b>  | Hospitalized patient       | Human - Urine          | Peru      | 2006 | 280    | Clinical subclade II | MJEW00000000                              |
| <b>E155</b>    | Healthy Individual Feces   | Human - Stool sample   | USA       | 1995 | 17     | Clinical subclade II | AUWX01                                    |

|                   |                            |                              |                |      |        |                      |              |
|-------------------|----------------------------|------------------------------|----------------|------|--------|----------------------|--------------|
| <b>BSAC_EC239</b> | Hospitalized patient       | Human - Blood                | United Kingdom | 2001 | 17     | Clinical subclade II | ERR374681    |
| <b>BSAC_EC227</b> | Hospitalized patient       | Human - Blood                | United Kingdom | 2001 | 17     | Clinical subclade II | ERR374688    |
| <b>BSAC_EC754</b> | Hospitalized patient       | Human - Blood                | United Kingdom | 2004 | 17     | Clinical subclade II | ERR374714    |
| <b>VRE0576</b>    | Hospitalized patient       | Human - Blood                | Sweden         | 2006 | 17     | Clinical subclade II | JAAK01       |
| <b>E1162</b>      | Hospitalized patient       | Human - Blood                | France         | 1997 | 17     | Clinical subclade II | ABQJ01       |
| <b>ATCC51559</b>  | Hospitalized patient       | Human - Blood                | USA            | 1992 | 17     | Clinical subclade II | JSVT01       |
| <b>E1165</b>      | Hospitalized patient       | Human - Wound                | Italy          | 1997 | 17     | Clinical subclade II | AUWW01       |
| <b>1231410</b>    | Hospitalized patient       | Human - Skin and soft tissue | USA            | 2005 | 17     | Clinical subclade II | ACBA01       |
| <b>E2297</b>      | Hospitalized patient       | Human - Urine                | USA            | 2001 | 117    | Clinical subclade II | AHXV01       |
| <b>ERV1</b>       | Hospitalized patient       | Human - Pleural liquid       | Colombia       | 1998 | 17     | Clinical subclade II | AMAY01       |
| <b>ERV107</b>     | Hospitalized patient       | Human - Blood                | Ecuador        | 2006 | 17     | Clinical subclade II | AMBA01       |
| <b>ERV127</b>     | Hospitalized patient       | Human - Blood                | Ecuador        | 2007 | 17     | Clinical subclade II | MJEX00000000 |
| <b>VRE3</b>       | Hospitalized patient       | Human - Blood                | USA            | 1998 | SLV-16 | Clinical subclade II | JSET01       |
| <b>C68</b>        | Hospitalized patient feces | Human feces                  | USA            | 1997 | 16     | Clinical subclade II | LPUE01       |
| <b>BSAC_EC426</b> | Hospitalized patient       | Human - Blood                | United Kingdom | 2002 | 16     | Clinical subclade II | ERR374669    |
| <b>BSAC_EC495</b> | Hospitalized patient       | Human - Blood                | United Kingdom | 2002 | 16     | Clinical subclade II | ERR374844    |

|                    |                            |                                   |                |      |        |         |           |
|--------------------|----------------------------|-----------------------------------|----------------|------|--------|---------|-----------|
| <b>1141733</b>     | Hospitalized patient       | Human - Wound                     | USA            | 2005 | 327    | Clade B | ACAZ01    |
| <b>17OM39</b>      | Healthy Individual Feces   | Human - Stool sample              | India          | 2015 | 76     | Clade B | LWHF01    |
| <b>7H8_DIV0219</b> | Animal                     | Marmot feces                      | Afghanistan    | 2015 | New ST | Clade B | NGKW01    |
| <b>825</b>         | Animal                     | Dairy cattle feces                | USA            | 2004 | SLV-94 | Clade B | NSDF01    |
| <b>BM4107</b>      | Hospitalized patient feces | Human feces                       | France         | 1988 | 172    | Clade B | JMII01    |
| <b>BSAC_EC555</b>  | Hospitalized patient       | Human - Blood                     | United Kingdom | 2003 | 1036   | Clade B | ERR374785 |
| <b>COM12</b>       | Healthy Individual Feces   | Non-hospitalized individual Feces | USA            | 2006 | 107    | Clade B | ACBC01    |
| <b>COM15</b>       | Healthy Individual Feces   | Non-hospitalized individual Feces | USA            | 2007 | 583    | Clade B | ACBD01    |
| <b>E1007</b>       | Healthy Individual Feces   | Non-hospitalized individual Feces | Netherlands    | 1998 | 61     | Clade B | AHWP01    |
| <b>E1590</b>       | Healthy Individual Feces   | Non-hospitalized individual Feces | Ireland        | 2001 | 163    | Clade B | AHXC01    |
| <b>E1604</b>       | Other                      | Cheese                            | Norway         | 1956 | 75     | Clade B | AHXD01    |
| <b>E1613</b>       | Other                      | Fish burger                       | Norway         | 1964 | 77     | Clade B | AHXE01    |
| <b>E1861</b>       | Hospitalized patient feces | Human feces                       | Spain          | 2001 | 289    | Clade B | AHXP01    |
| <b>E1972</b>       | Hospitalized patient       | Human - Blood                     | Germany        | 2000 | 94     | Clade B | AHXR01    |

|                  |                          |                                                |             |      |        |         |        |
|------------------|--------------------------|------------------------------------------------|-------------|------|--------|---------|--------|
| <b>E2039</b>     | Hospitalized patient     | Human - K-spitze                               | Germany     | 2000 | 296    | Clade B | AHXS01 |
| <b>E2620</b>     | Hospitalized patient     | Human - Blood                                  | Netherlands | 2006 | 1175   | Clade B | AHXW01 |
| <b>E3083</b>     | Hospitalized patient     | Human - Blood                                  | Netherlands | 2000 | 327    | Clade B | AHXZ01 |
| <b>E3548</b>     | Hospitalized patient     | Human - Blood                                  | Netherlands | 2004 | 328    | Clade B | AHYB01 |
| <b>E980</b>      | Healthy Individual Feces | Human - Healthy volunteer                      | Netherlands | 1998 | 94     | Clade B | ABQA01 |
| <b>F1129D110</b> | Animal                   | Bos taurus feces                               | Canada      | 2004 | New ST | Clade B | MJDY01 |
| <b>GM75</b>      | Other                    | Cheese                                         | Argentina   | 2011 | 94     | Clade B | LKPI01 |
| <b>HP_5_10</b>   | Healthy Individual Feces | Human feces                                    | Russia      | 2016 | New ST | Clade B | PCGB01 |
| <b>JB00008</b>   | Other                    | Korean fermented soybean paste (cheonggukjang) | South Korea | 2015 | 94     | Clade B | NPOO01 |
| <b>KACC15689</b> | Other                    | Doenjang fermented soybean paste               | South Korea | 2013 | New ST | Clade B | LBIT01 |
| <b>KACC15700</b> | Other                    | Ganjang fermented soy sauce                    | South Korea | 2013 | New ST | Clade B | LDNC01 |
| <b>KACC15711</b> | Other                    | Meju fermented soybeans                        | South Korea | 2013 | New ST | Clade B | LDND01 |
| <b>KACC15960</b> | Other                    | Doenjang fermented soybean paste               | South Korea | 2013 | New ST | Clade B | LDNE01 |

|                    |                          |                                   |                |        |        |         |           |
|--------------------|--------------------------|-----------------------------------|----------------|--------|--------|---------|-----------|
| <b>KACC16093</b>   | Other                    | Meju fermented soybeans           | South Korea    | 2013   | New ST | Clade B | LDNH01    |
| <b>L_X</b>         | Other                    | Probiotic preparation             | Russia         | 2010   | 812    | Clade B | JRGY01    |
| <b>M3K31</b>       | Animal                   | Griffon vulture                   | Spain          | 2010   | 76     | Clade B | LAXK01    |
| <b>NCTC7378</b>    | Hospitalized patient     | Human - Blood                     | United Kingdom | ≤ 1946 | 361    | Clade B | ERR375567 |
| <b>PC4_1</b>       | Healthy Individual Feces | Non-hospitalized individual Feces | Australia      | 2008   | 720    | Clade B | ADMM01    |
| <b>TX1330</b>      | Healthy Individual Feces | Non-hospitalized individual Feces | USA            | 2006   | 107    | Clade B | ACHL01    |
| <b>11F9MSG5001</b> | Animal                   | Chelonia mydas feces              | Brazil         | 0      | 688    | Clade B | NGMK01    |
| <b>UBA4566</b>     | Other                    | Wood                              | USA            | 2015   | 946    | Clade B | DGKQ01    |
| <b>UC7256</b>      | Other                    | Food                              | Italy          | 0      | 74     | Clade B | AWWM01    |
| <b>UC8668</b>      | Other                    | Food                              | Italy          | 0      | New ST | Clade B | AWWN01    |



**Supplementary table 2.** Genomic characteristics of the clades A and B of *E. faecium* population.

|                                                            | <b>CLADE A</b>     | <b>CLADE B</b>     |
|------------------------------------------------------------|--------------------|--------------------|
| <b>Genome size</b>                                         | 2.908 Mb ± 0.19 Mb | 2.833 Mb ± 0.16 Mb |
| <b>Gene content</b>                                        | 2801 ± 208 genes   | 2736 ± 156 genes   |
| <b>Pan genome</b>                                          | 10382 orthogroups  | 23746 orthogroups  |
| <b>Core genome</b>                                         | 1182 orthogroups   | 1466 orthogroups   |
| <b>Average number of virulence genes</b>                   | 21.6               | 13.7               |
| <b>Average number of <i>rep</i> plasmids genes</b>         | 3.24               | 2.16               |
| <b>Average number of Insertion Sequences (IS) families</b> | 7.4                | 4.1                |

**Supplementary table 3.** Comparison of the prevalences and frequencies of genetic elements related to antibiotic resistance, virulence, mobile elements, plasmid families and CRISPR/CAS-system among the genomes from the subgroups in the clade A. Not applicable (NA) results were obtained when the proportion of the element for both compared groups was zero.

| Category                | Description                | Element                                    | Animal branches | CRS-I      | CRS-II     | P value of the difference of proportions (X <sup>2</sup> test) between |                  | 95% Confidence Intervals of the differences of proportions |                  |
|-------------------------|----------------------------|--------------------------------------------|-----------------|------------|------------|------------------------------------------------------------------------|------------------|------------------------------------------------------------|------------------|
|                         |                            |                                            | (n=73)          | (n=101)    | (n=124)    | Animal vs CRS-I                                                        | Animal vs CRS-II | Animal vs CRS-I                                            | Animal vs CRS-II |
|                         |                            |                                            | % (n)           | % (n)      | % (n)      |                                                                        |                  |                                                            |                  |
| Resistance              | Glycopeptides resistance   | VanA                                       | 32,8 (24)       | 70,2 (71)  | 65,3 (81)  | < .001                                                                 | < .001           | [-52.6, -22.3]                                             | [-47.2, -17.7]   |
|                         |                            | VanB                                       | 0 (0)           | 11,8 (12)  | 9,6 (12)   | .005                                                                   | .014             | [-19.4, -4.4]                                              | [-16, -3.4]      |
|                         |                            | VanD                                       | 1,3 (1)         | 0 (0)      | 0 (0)      | .87                                                                    | .788             | [-2.5, 5.2]                                                | [-2.4, 5.1]      |
|                         |                            | Total                                      | 34,2 (25)       | 82,1 (83)  | 75 (93)    | < .001                                                                 | < .001           | [-62.3, -33.6]                                             | [-55.1, -26.4]   |
|                         | Aminoglycosides resistance | aac(6')-aph(2'')                           | 6,8 (5)         | 52,4 (53)  | 47,5 (59)  | < .001                                                                 | < .001           | [-58.1, -33.1]                                             | [-52.3, -29.1]   |
|                         |                            | ant(6)-Ia                                  | 16,4 (12)       | 74,2 (75)  | 71,7 (89)  | < .001                                                                 | < .001           | [-71, -44.6]                                               | [-68, -42.6]     |
|                         |                            | aph(3')-III                                | 12,3 (9)        | 82,1 (83)  | 71,7 (89)  | < .001                                                                 | < .001           | [-81.6, -58.1]                                             | [-71.5, -47.4]   |
|                         |                            | aadD, aph(2'')-Ib, aph(2'')-Id, spc or str | 15 (11)         | 7,9 (8)    | 4 (5)      | .212                                                                   | .013             | [-3.8, 18.1]                                               | [1, 21]          |
|                         | Total                      | 21,9 (16)                                  | 90 (91)         | 81,4 (101) | < .001     | < .001                                                                 | [-80.5, -55.9]   | [-72.3, -46.7]                                             |                  |
|                         | Fluroquinolones resistance | GyrA mutations                             | 1,3 (1)         | 96 (97)    | 86,2 (107) | < .001                                                                 | < .001           | [-100, -88.8]                                              | [-92.6, -77.2]   |
|                         |                            | ParC mutations                             | 2,7 (2)         | 100 (101)  | 86,2 (107) | < .001                                                                 | < .001           | [-100, -92.3]                                              | [-91.8, -75.3]   |
|                         |                            | Total                                      | 2,7 (2)         | 100 (101)  | 98,3 (122) | < .001                                                                 | < .001           | [-100, -92.3]                                              | [-100, -90.2]    |
| Ampicillin resistance   | PBP5-R                     | 9,5 (7)                                    | 94 (95)         | 96,7 (120) | < .001     | < .001                                                                 | [-93.8, -75.1]   | [-95.7, -78.7]                                             |                  |
| Trimethoprim resistance | dfrG                       | 4,1 (3)                                    | 13,8 (14)       | 53,2 (66)  | .06        | < .001                                                                 | [-19.1, -0.4]    | [-60.1, -38.1]                                             |                  |

|                   |                          |              |           |           |            |             |        |               |                |                |
|-------------------|--------------------------|--------------|-----------|-----------|------------|-------------|--------|---------------|----------------|----------------|
|                   |                          | erm(A)       | 5,4 (4)   | 6,9 (7)   | 3,2 (4)    | .942        | .688   | [-9.8, 6.9]   | [-4.9, 9.4]    |                |
|                   |                          | erm(B)       | 39,7 (29) | 85,1 (86) | 83 (103)   | < .001      | < .001 | [-59.8, -31]  | [-57.4, -29.2] |                |
|                   |                          | erm(G)       | 0 (0)     | 0 (0)     | 0,8 (1)    | NA          | 1      | [0, 0]        | [-3.2, 1.6]    |                |
|                   |                          | erm(T)       | 1,3 (1)   | 0,9 (1)   | 10,4 (13)  | 1           | .034   | [-3.3, 4.1]   | [-16.2, -2]    |                |
| MLSb resistance   |                          | lnu(B)       | 9,5 (7)   | 25,7 (26) | 4,8 (6)    | .012        | .317   | [-28.2, -4.1] | [-4.1, 13.6]   |                |
|                   |                          | msr(C)       | 95,8 (70) | 100 (101) | 97,5 (121) | .142        | .812   | [-9.8, 1.6]   | [-8.1, 4.7]    |                |
|                   |                          | vat(D)       | 6,8 (5)   | 0 (0)     | 0 (0)      | .027        | .013   | [-0.1, 13.8]  | [0, 13.7]      |                |
|                   |                          | vat(E)       | 5,4 (4)   | 0 (0)     | 0 (0)      | .061        | .034   | [-0.9, 11.9]  | [-0.8, 11.8]   |                |
|                   |                          | Total        | 98,6 (72) | 100 (101) | 100 (124)  | .87         | .788   | [-5.2, 2.5]   | [-5.1, 2.4]    |                |
|                   | Tetracyclines resistance |              | tet(L)    | 19,1 (14) | 34,6 (35)  | 30,6 (38)   | .038   | .11           | [-29.6, -1.3]  | [-24.7, 1.8]   |
|                   |                          |              | tet(M)    | 46,5 (34) | 44,5 (45)  | 60,4 (75)   | .912   | .08           | [-14.2, 18.2]  | [-29.3, 1.5]   |
|                   |                          | tet(S)       | 1,3 (1)   | 0,9 (1)   | 3,2 (4)    | 1           | .74    | [-3.3, 4.1]   | [-7, 3.3]      |                |
|                   |                          | Total        | 50,6 (37) | 57,4 (58) | 63,7 (79)  | .467        | .1     | [-22.9, 9.4]  | [-28.4, 2.3]   |                |
| Phlopa resistance |                          | cat          | 9,5 (7)   | 0 (0)     | 9,6 (12)   | .005        | 1      | [1.7, 17.5]   | [-8.7, 8.5]    |                |
|                   |                          | fexA         | 0 (0)     | 0 (0)     | 0,8 (1)    | NA          | 1      | [0, 0]        | [-3.2, 1.6]    |                |
|                   |                          | cfrB         | 0 (0)     | 0 (0)     | 0,8 (1)    | NA          | 1      | [0, 0]        | [-3.2, 1.6]    |                |
|                   |                          | optrA        | 0 (0)     | 0 (0)     | 0,8 (1)    | NA          | 1      | [0, 0]        | [-3.2, 1.6]    |                |
|                   |                          | 23s mutation | 0 (0)     | 2,9 (3)   | 2,9 (3)    | .37         | .304   | [-7.5, 1.5]   | [-7.4, 1]      |                |
|                   |                          | Total        | 9,5 (7)   | 2,9 (3)   | 11,2 (14)  | .128        | .892   | [-2.1, 15.3]  | [-11.5, 8.1]   |                |
| Virulence         | Pili forming clusters    | PilA         | SrtA      | 79,4 (58) | 87,1 (88)  | 85,4 (106)  | .369   | .229          | [-20.2, 4.8]   | [-18.3, 6.2]   |
|                   |                          |              | Fms21     | 78 (57)   | 87,1 (88)  | 89,5 (111)  | .047   | .047          | [-21.7, 3.7]   | [-23.4, 0.6]   |
|                   |                          |              | SrtC4     | 73,9 (54) | 81,1 (82)  | 70,9 (88)   | .772   | .359          | [-21, 6.6]     | [-10.9, 16.9]  |
|                   |                          |              | Fms20     | 75,3 (55) | 88,1 (89)  | 91,12 (113) | .004   | .007          | [-25.7, 0.1]   | [-28, -3.6]    |
|                   |                          | PilB         | EbpA      | 76,7 (56) | 97 (98)    | 97,58 (121) | < .001 | < .001        | [-31.7, -8.9]  | [-32, -9.7]    |
|                   |                          |              | EbpB      | 73,9 (54) | 97 (98)    | 97,58 (121) | < .001 | < .001        | [-34.8, -11.3] | [-35.1, -12.1] |
|                   |                          |              | EbpC      | 75,3 (55) | 95 (96)    | 98,38 (122) | < .001 | < .001        | [-31.6, -7.8]  | [-34.3, -11.8] |
|                   |                          |              | SrtC1     | 83,5 (61) | 97 (98)    | 99,19 (123) | < .001 | < .001        | [-23.8, -3.2]  | [-25.4, -5.9]  |

|                                             |           |           |            |             |        |             |                |                |
|---------------------------------------------|-----------|-----------|------------|-------------|--------|-------------|----------------|----------------|
| Pili forming clusters                       | Fms14     | 68,4 (50) | 91 (92)    | 91,12 (113) | < .001 | < .001      | [-35.8, -9.4]  | [-35.5, -9.8]  |
|                                             | Fms17     | 69,8 (51) | 88,1 (89)  | 87,09 (108) | .005   | .007        | [-31.7, -4.8]  | [-30.4, -4.1]  |
|                                             | Fms13     | 91,7 (67) | 98 (99)    | 93,5 (116)  | .857   | .358        | [-14.3, 1.8]   | [-10.5, 7]     |
|                                             | SrtC2     | 100 (73)  | 100 (101)  | 100 (124)   | NA     | 1           | [0, 0]         | [0, 0]         |
|                                             | Fms11     | 30,1 (22) | 81,1 (82)  | 95,96 (119) | < .001 | < .001      | [-65.2, -36.9] | [-78, -53.7]   |
|                                             | Fms19     | 27,3 (20) | 86,1 (87)  | 95,96 (119) | < .001 | < .001      | [-72.2, -45.3] | [-80.5, -56.7] |
|                                             | Fms16     | 30,1 (22) | 87,1 (88)  | 96,77 (120) | < .001 | < .001      | [-70.6, -43.4] | [-78.7, -54.6] |
|                                             | SrtC3     | 30,1 (22) | 87,1 (88)  | 96,77 (120) | < .001 | < .001      | [-70.6, -43.4] | [-78.7, -54.6] |
| LPxTG-containing proteins<br>Adhesins       | Acm       | 53,4 (39) | 100 (101)  | 99,1 (123)  | < .001 | < .001      | [-59.2, -34]   | [-58.4, -33.1] |
|                                             | Scm       | 21,9 (16) | 56,4 (57)  | 48,38 (60)  | < .001 | < .001      | [-49.2, -19.8] | [-40.5, -12.4] |
|                                             | EcbA      | 4,1 (3)   | 59,4 (60)  | 38,7 (48)   | < .001 | < .001      | [-67.1, -43.5] | [-45.4, -23.8] |
|                                             | Espfm     | 0 (0)     | 28,7 (29)  | 25 (31)     | < .001 | < .001      | [-38.7, -18.7] | [-33.7, -16.3] |
|                                             | SgrA      | 6,8 (5)   | 80,1 (81)  | 66,93 (83)  | < .001 | < .001      | [-84.2, -62.5] | [-71.3, -48.9] |
|                                             | Fms3      | 100 (73)  | 100 (101)  | 98,4 (122)  | NA     | 1           | [0, 0]         | [-1.6, 3.2]    |
|                                             | Fms6      | 84,9 (62) | 100 (101)  | 99,2 (123)  | < .001 | < .001      | [-24.5, -5.7]  | [-24.4, -5.8]  |
|                                             | Fms7      | 83,6 (61) | 96 (97)    | 95,2 (118)  | .021   | .013        | [-21.3, -0.9]  | [-21, -1]      |
|                                             | Fms12     | 93,2 (68) | 98 (99)    | 97,6 (121)  | .408   | .273        | [-10.6, 3.6]   | [-10.6, 2.9]   |
|                                             | Fms22     | 24,7 (18) | 0,9 (1)    | 58,1 (72)   | < .001 | < .001      | [13.6, 36.5]   | [-47.2, -18.5] |
| Fnm                                         | 100 (100) | 98 (99)   | 97,5 (121) | .625        | .461   | [-1.9, 5.9] | [-1.4, 6.2]    |                |
| Secreted antigen A                          | SagA      | 87,6 (64) | 98 (99)    | 94,3 (117)  | .014   | .164        | [-19.5, -1.2]  | [-16.3, 3]     |
| Carbohydrate transport and gut colonization | PtsD      | 5,4 (4)   | 95 (96)    | 93,5 (116)  | < .001 | < .001      | [-97.5, -81.7] | [-95.9, -80.2] |
| Glycosyl hydrolase                          | hyfEfm    | 0 (0)     | 19,8 (20)  | 34,6 (43)   | < .001 | < .001      | [-28.8, -10.9] | [-44.1, -25.2] |
| WxL-containing proteins                     | SwpA      | 100 (100) | 100 (101)  | 100 (124)   | NA     | NA          | [0, 0]         | [0, 0]         |
|                                             | SwpB      | 94,5 (69) | 97 (98)    | 98,3 (122)  | .659   | .273        | [-9.9, 4.9]    | [-10.6, 2.9]   |
|                                             | SwpC      | 84,9 (62) | 27,7 (28)  | 91,1 (113)  | < .001 | .271        | [44, 70.4]     | [-16.9, 4.5]   |

|                     |                               |                             |           |            |             |        |              |                |                |
|---------------------|-------------------------------|-----------------------------|-----------|------------|-------------|--------|--------------|----------------|----------------|
| Plasmid families    | <i>pLG1</i> megaplasmid       | rep-Efae287                 | 82,1 (60) | 85,1 (86)  | 84,6 (105)  | .752   | .979         | [-15.3, 9.4]   | [-14.4, 9.4]   |
|                     | <i>pRUM</i>                   | rep17                       | 10,9 (8)  | 79,2 (80)  | 62,09 (77)  | < .001 | < .001       | [-80.1, -56.4] | [-63.4, -38.9] |
|                     | Rolling circle replication    | rep14                       | 6,8 (5)   | 18,8 (19)  | 46,77 (58)  | .041   | < .001       | [-22.7, -1.2]  | [-51.5, -28.3] |
|                     | Rep_3                         | rep-pClZ2                   | 6,8 (5)   | 20,7 (21)  | 37,9 (47)   | .019   | < .001       | [-24.9, -3]    | [-42.5, -19.6] |
|                     |                               | rep11                       | 4,1 (3)   | 28,7 (29)  | 20,96 (26)  | < .001 | .002         | [-35.7, -13.5] | [-26.4, -7.3]  |
|                     |                               | rep18                       | 6,8 (5)   | 28,7 (29)  | 28,22 (35)  | < .001 | < .001       | [-33.6, -10.1] | [-32.3, -10.5] |
|                     | Inc18 (pRE25)                 | rep2                        | 26 (19)   | 40,5 (41)  | 40,3 (50)   | .066   | .06          | [-29.6, 0.5]   | [-28.6, 0.1]   |
|                     |                               | rep1                        | 34,2 (25) | 0,9 (1)    | 10,48 (13)  | < .001 | < .001       | [21, 45.5]     | [10.5, 37]     |
|                     | Broad range hosts             | rep7                        | 1,3 (1)   | 0,9 (1)    | 4 (5)       | 1      | .534         | [-3.3, 4.1]    | [-8.1, 2.8]    |
|                     | Described in <i>S. aureus</i> | rep22                       | 5,4 (4)   | 15,8 (16)  | 20,16 (25)  | .06    | .009         | [-20.4, -0.4]  | [-24.6, -4.8]  |
|                     | rep-pUB110                    | 8,2 (6)                     | 15,8 (16) | 20,16 (25) | .206        | .043   | [-18.3, 3.1] | [-22.5, -1.4]  |                |
| Rep trans           | rep-pHTBeta                   | 1,3 (1)                     | 1,9 (2)   | 14,51 (18) | 1           | .005   | [-5, 3.8]    | [-21, -5.3]    |                |
| Insertion Sequences | IS16                          | IS16                        | 9,5 (7)   | 95 (96)    | 99,1 (123)  | < .001 | < .001       | [-94.6, -76.3] | [-97.6, -81.6] |
|                     | IS3                           | ISefa10, ISEfa8 and ISEnfa3 | 75,3 (55) | 96 (97)    | 99,19 (123) | < .001 | < .001       | [-32.5, -8.9]  | [-35, -12.8]   |
|                     | IS1182                        | ISEfa12 and ISEfa7          | 36,9 (27) | 89,1 (90)  | 91,12 (113) | < .001 | < .001       | [-65.9, -38.3] | [-67.4, -40.9] |
|                     | IS200/IS605                   | ISEfa4 and ISEnfa200        | 24,6 (18) | 90 (91)    | 74,19 (92)  | < .001 | < .001       | [-78.1, -52.8] | [-63.2, -35.9] |
|                     | IS19/IS982                    | ISEfm1                      | 91,7 (67) | 80,1 (81)  | 90,3 (112)  | .057   | .93          | [0.4, 22.8]    | [-7.8, 10.7]   |
|                     | ISL3                          | ISEfa11 and ISEfa5          | 20,5 (15) | 82,1 (83)  | 82,25 (102) | < .001 | < .001       | [-74.7, -48.6] | [-74.2, -49.2] |
|                     | IS6 <i>Lactococcus lactis</i> | ISS1                        | 71,2 (52) | 83,1 (84)  | 53,2 (66)   | .09    | .019         | [-25.8, 1.9]   | [3.3, 32.7]    |
|                     | IS6 <i>Lactobacillus sake</i> | ISS1W                       | 78 (57)   | 29,7 (30)  | 37,09 (46)  | < .001 | < .001       | [34.2, 62.6]   | [27.2, 54.8]   |
|                     | IS256                         | ISEfa13 and ISEfm2          | 76,7 (56) | 30,6 (31)  | 43,5 (54)   | < .001 | < .001       | [31.6, 60.4]   | [19, 47.3]     |

|                                          |         |           |           |           |      |      |              |               |
|------------------------------------------|---------|-----------|-----------|-----------|------|------|--------------|---------------|
| IS256<br><i>Lactococcus<br/>garvieae</i> | ISLgar5 | 26 (19)   | 6,9 (7)   | 44,3 (55) | .001 | .015 | [6.7, 31.5]  | [-32.7, -3.9] |
| IS5                                      | ISKpn26 | 0 (0)     | 0,9 (1)   | 0 (0)     | 1    | NA   | [-3.9, 1.9]  | [0, 0]        |
| CRISPR                                   |         | 38,3 (28) | 23,7 (24) | 30,6 (38) | .048 | .056 | [-0.5, 29.7] | [-7.2, 22.6]  |
| Cas-system                               |         | 0 (0)     | 0 (0)     | 1,6 (2)   | 1    | NA   | [0, 0]       | [-4.9, 1.7]   |









**A**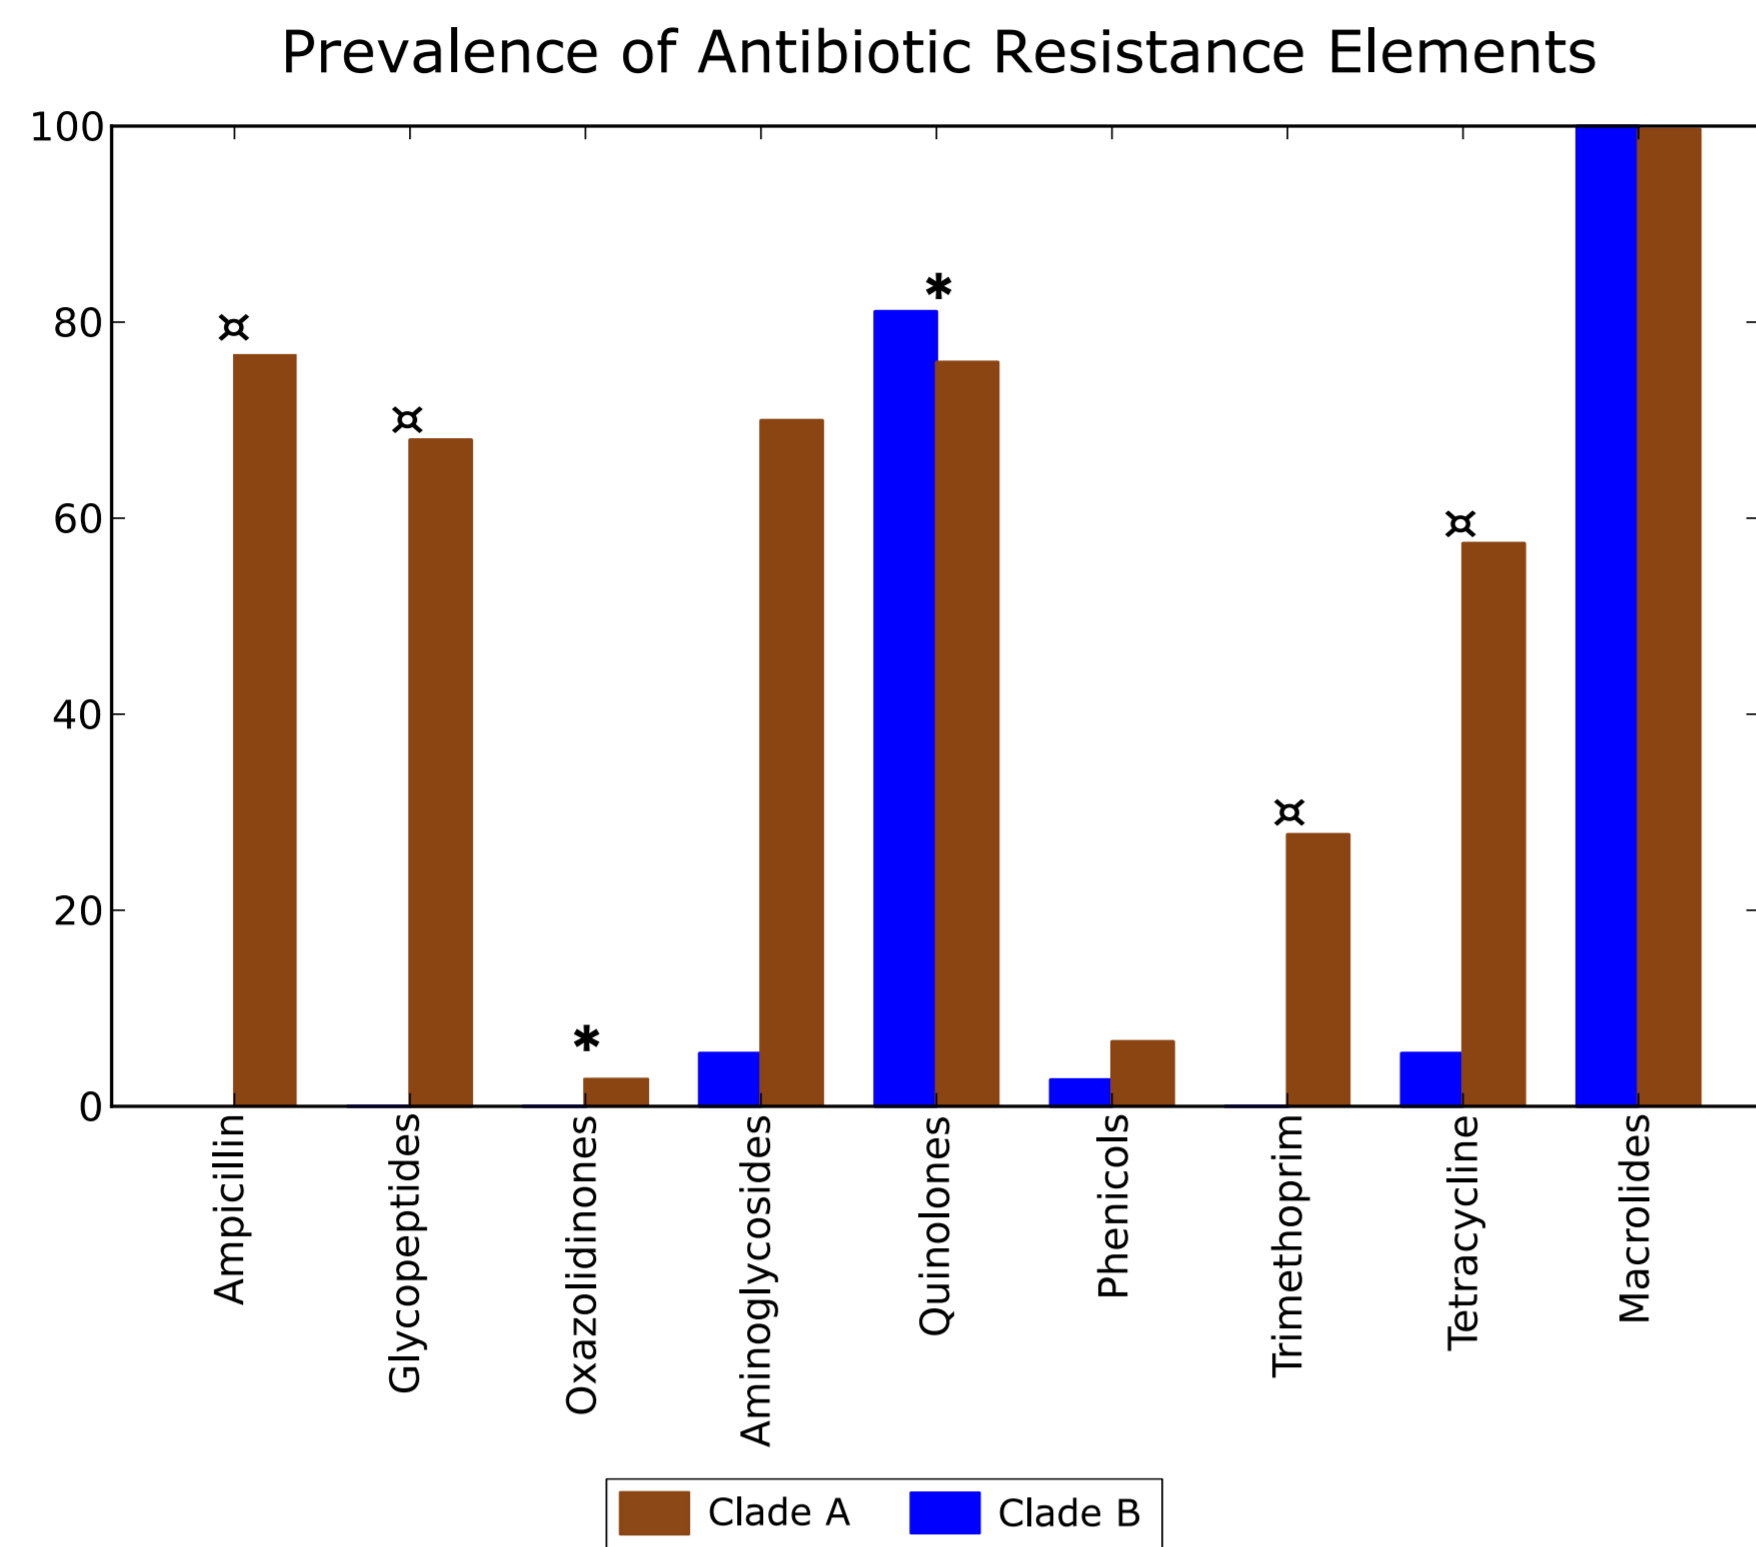**B**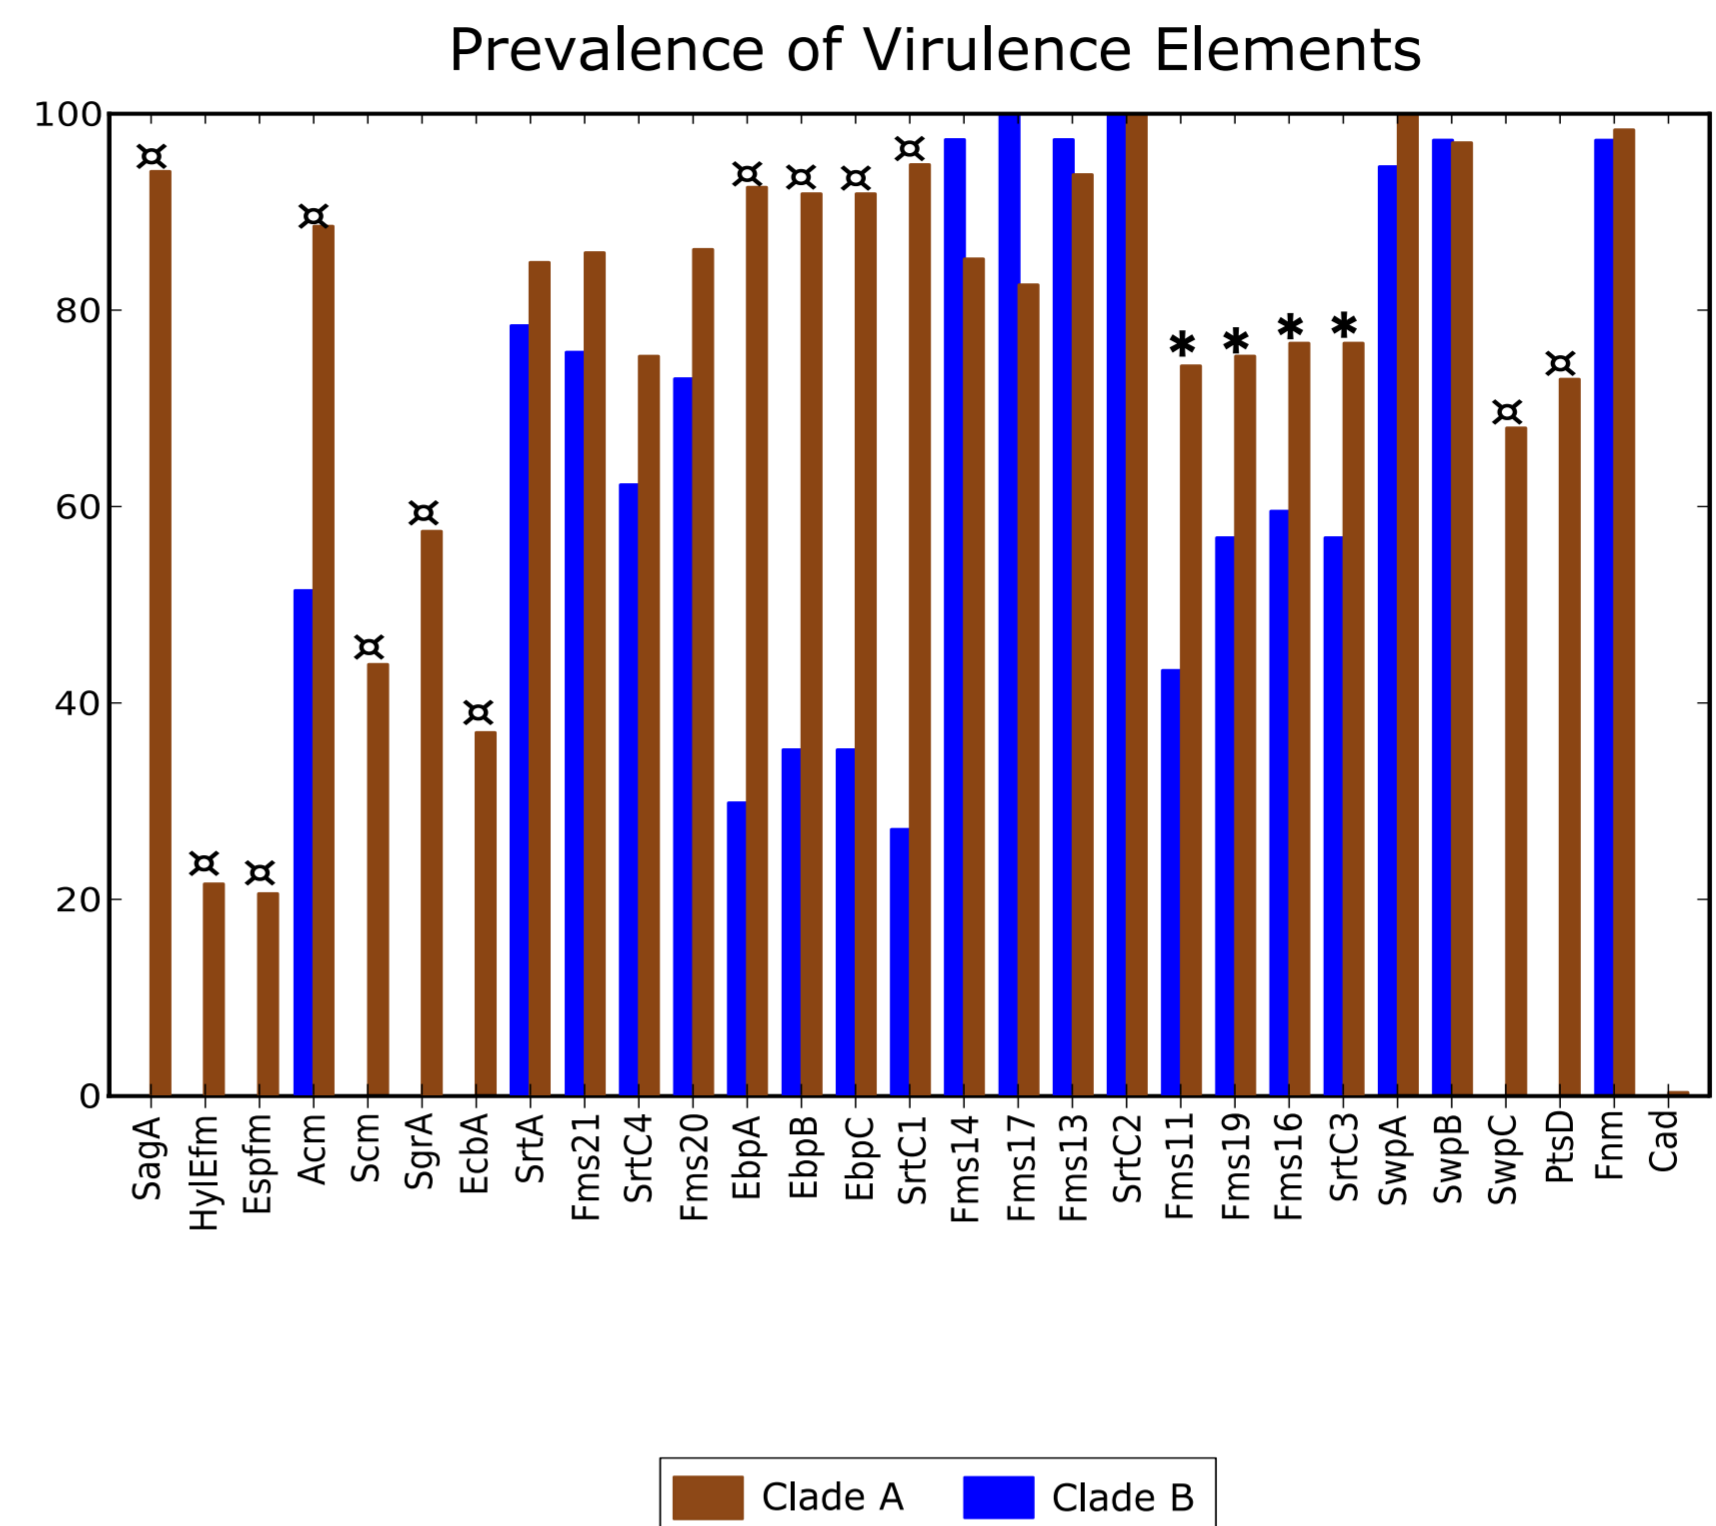**C**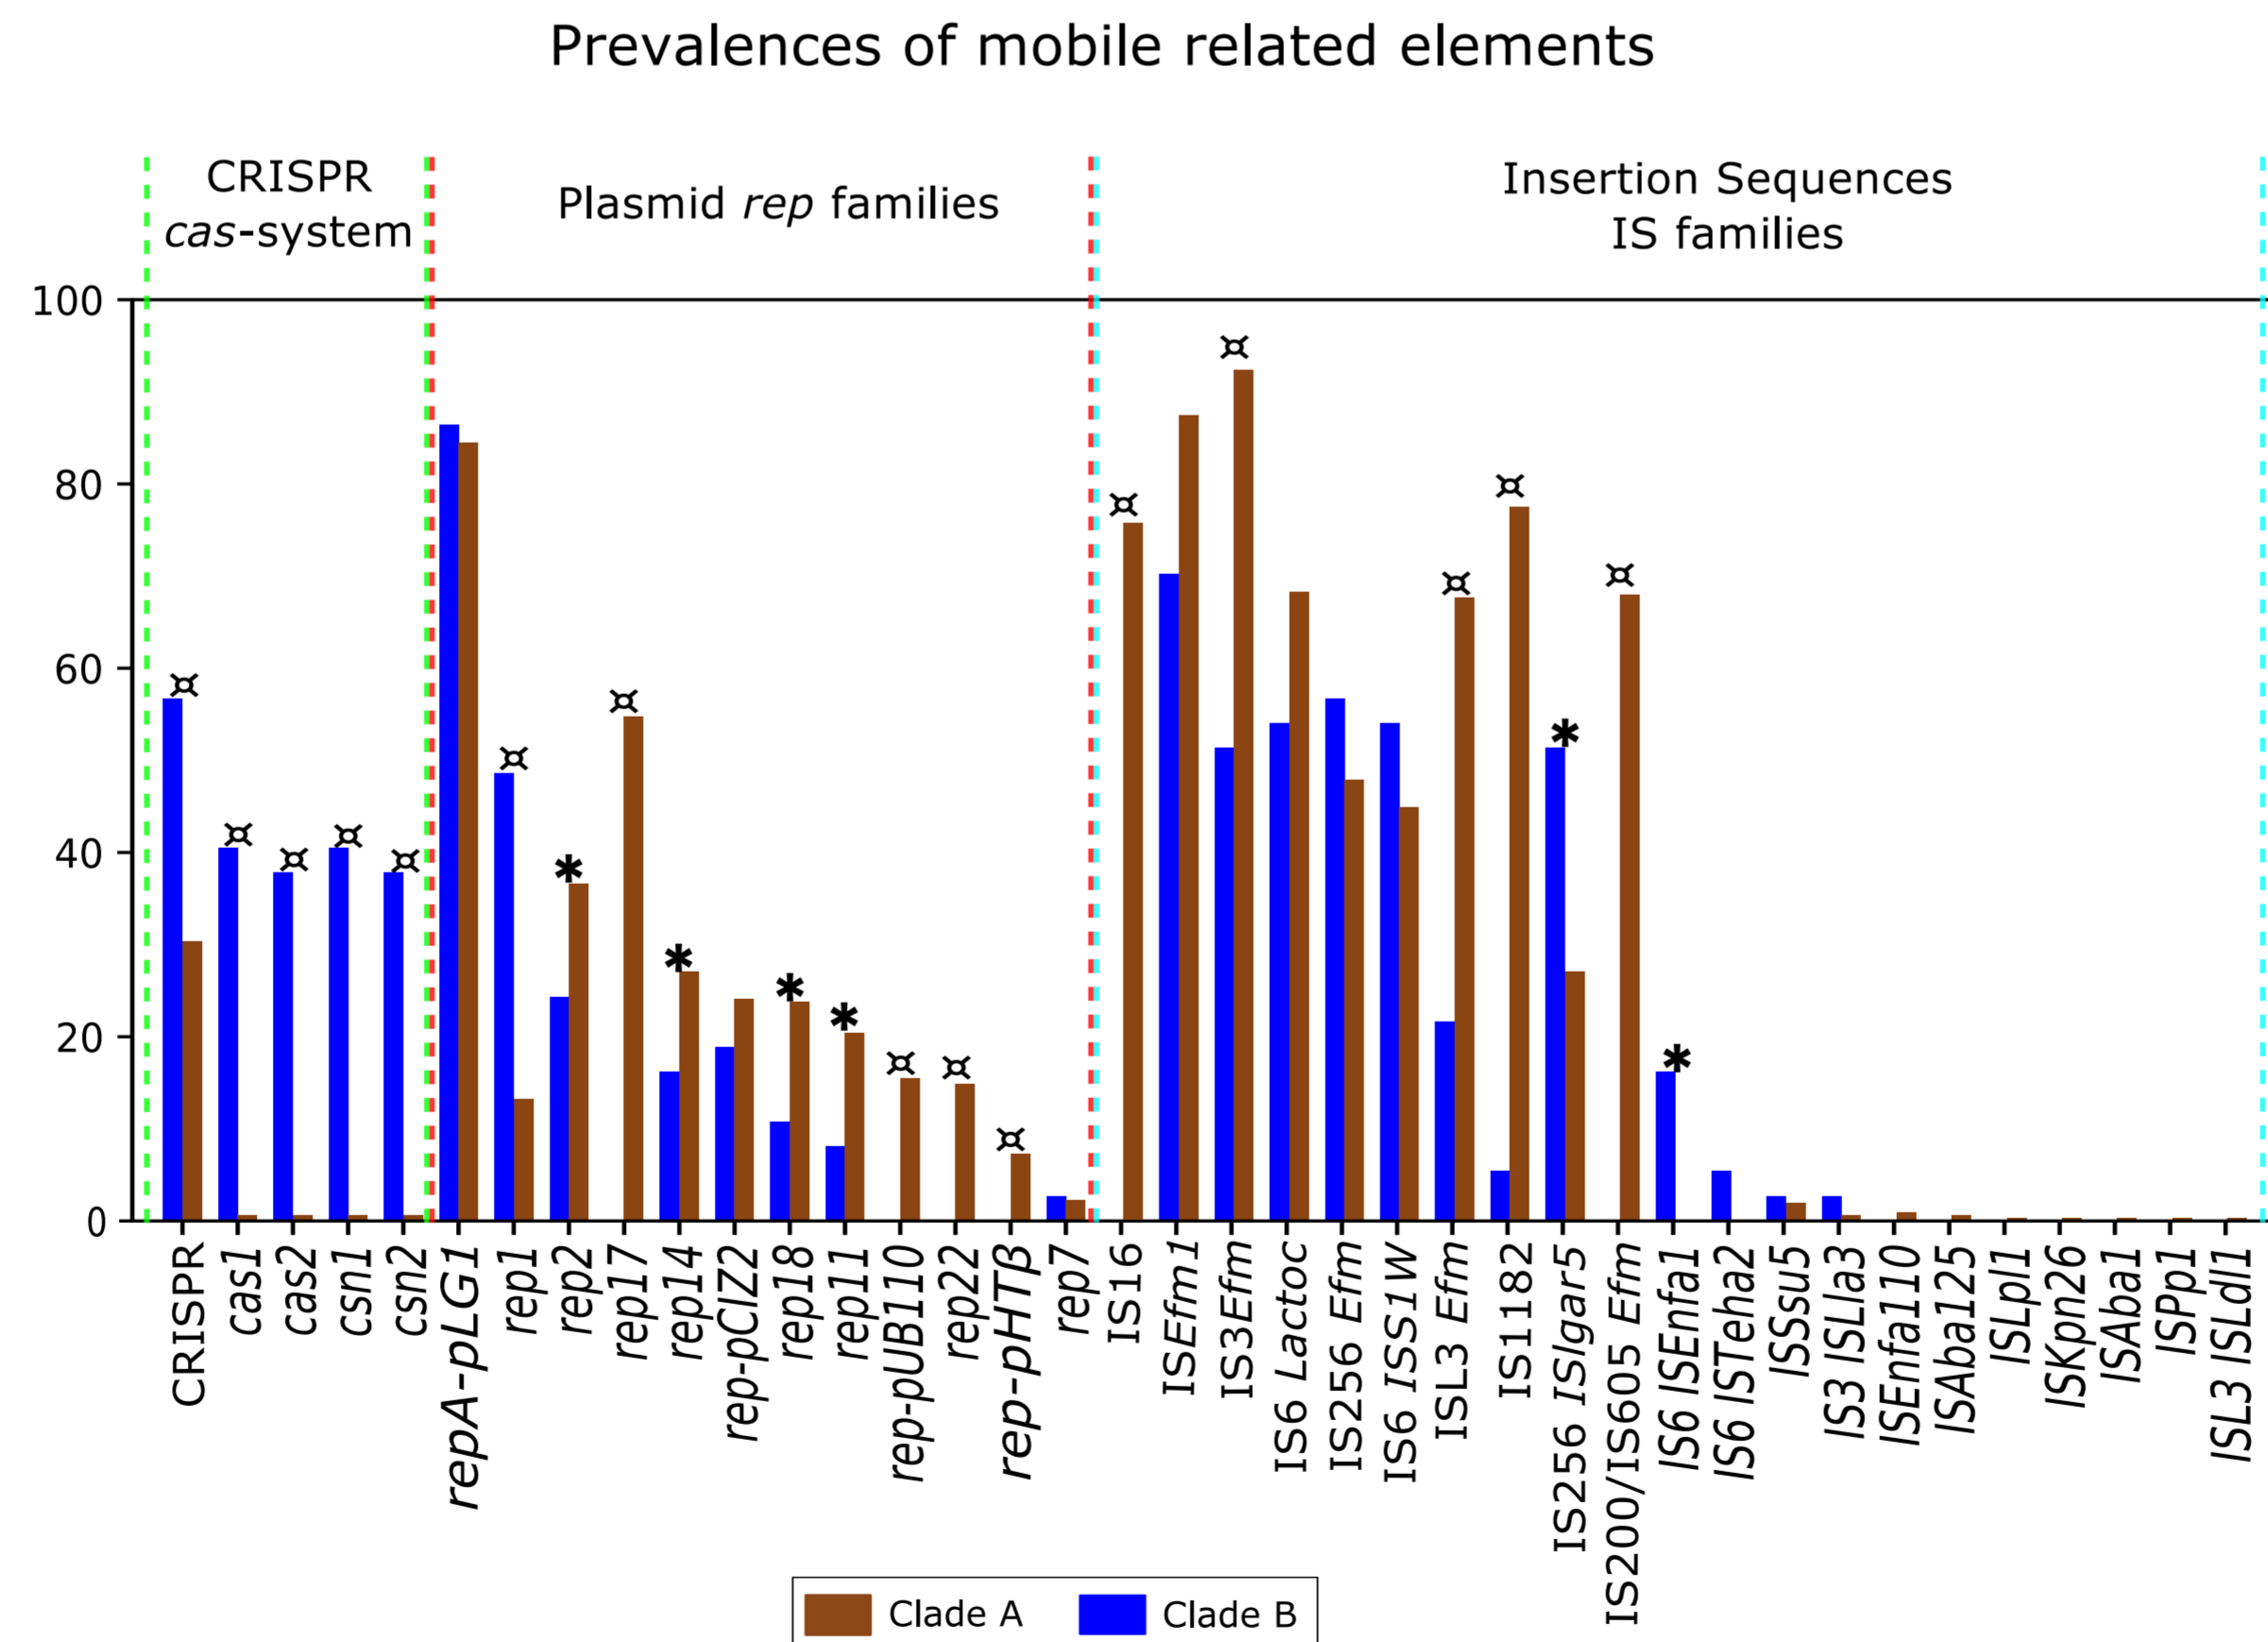

**Supplementary Figure 1.** (A) Prevalence of genetic elements associated with resistance against different groups of antibiotics in each of the clades. Ampicillin resistance was predicted based on a random forest model using the sequences of the PBP5 protein of susceptible and resistant isolates. (B) Prevalence of putative virulence determinants in each of the clades. (C) Prevalence of mobile genetic elements in each of the clades including isolates harboring the CRISPR cas-system, plasmid rep families and insertion sequences.

\*p-value  $\leq 0.05$   
 x p-value  $\leq 0.001$

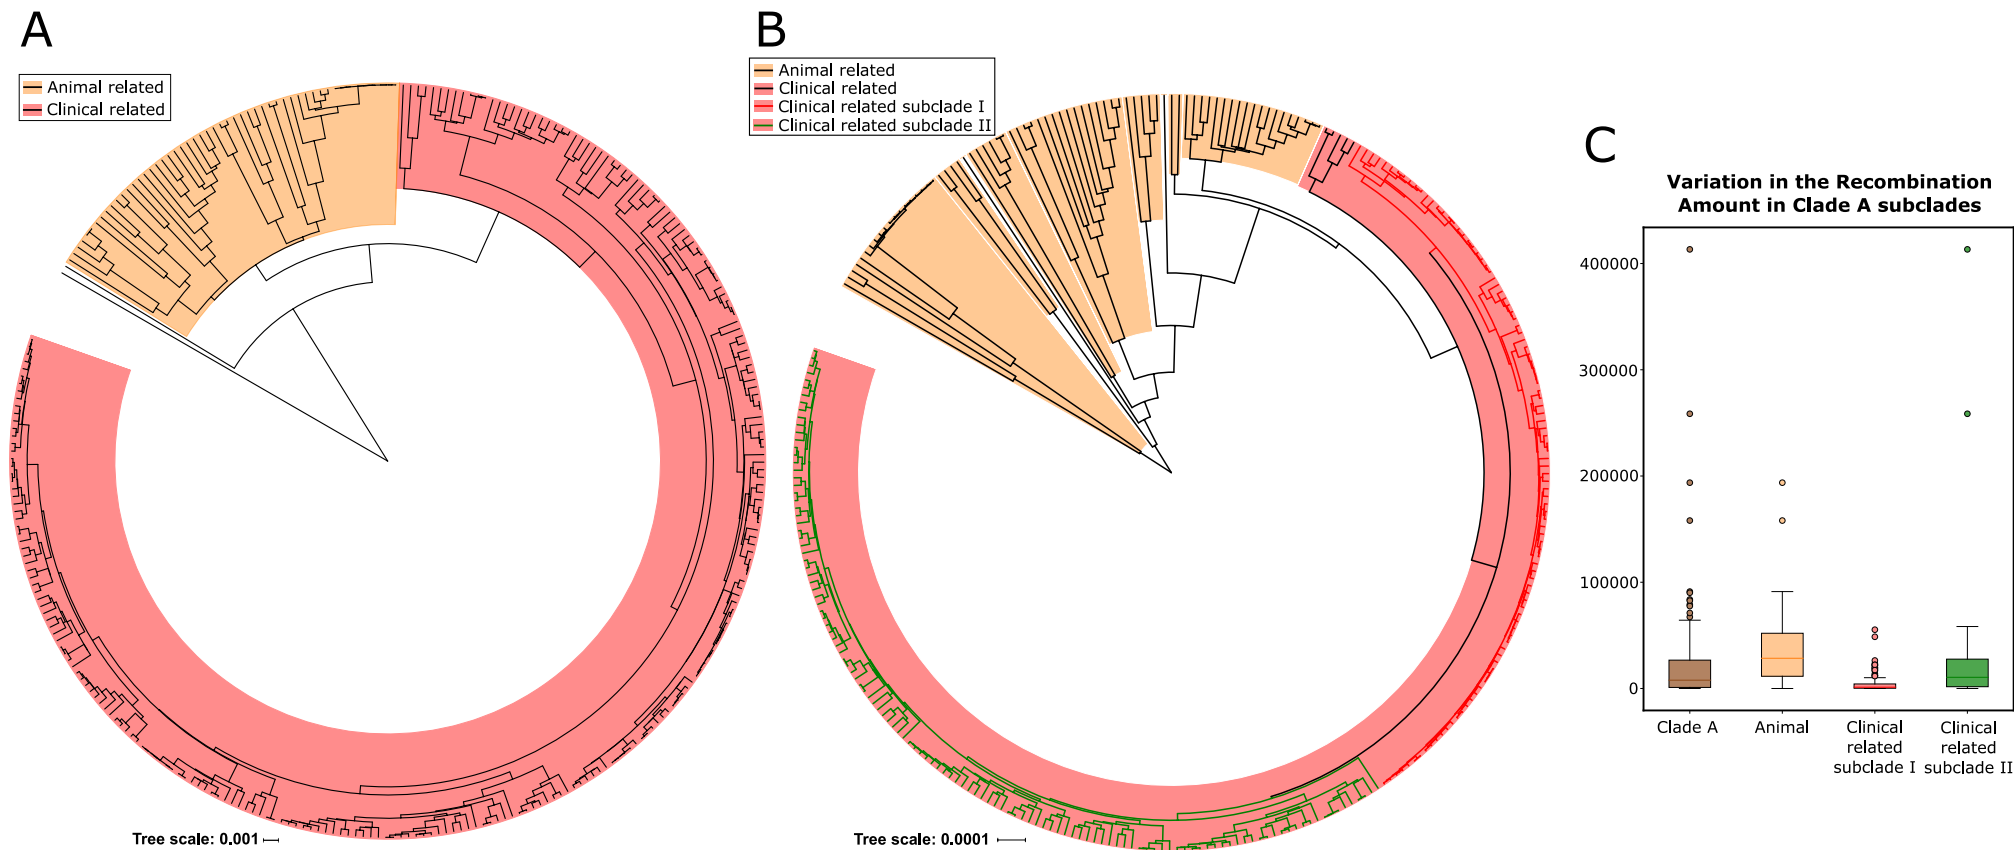

**Supplemental Figure 2.** Comparison of maximum clade credibility trees including (A) and excluding recombinant regions (B). Both trees show the subclade/branches related to animal (orange background) and clinical sources (red background). (C) Box and whiskers plot of the amount of recombination in the genomes belonging to different subclades/branches in the clade A, based on the recombination regions defined by ClonalFrame. Colored dots represent outliers within each group.

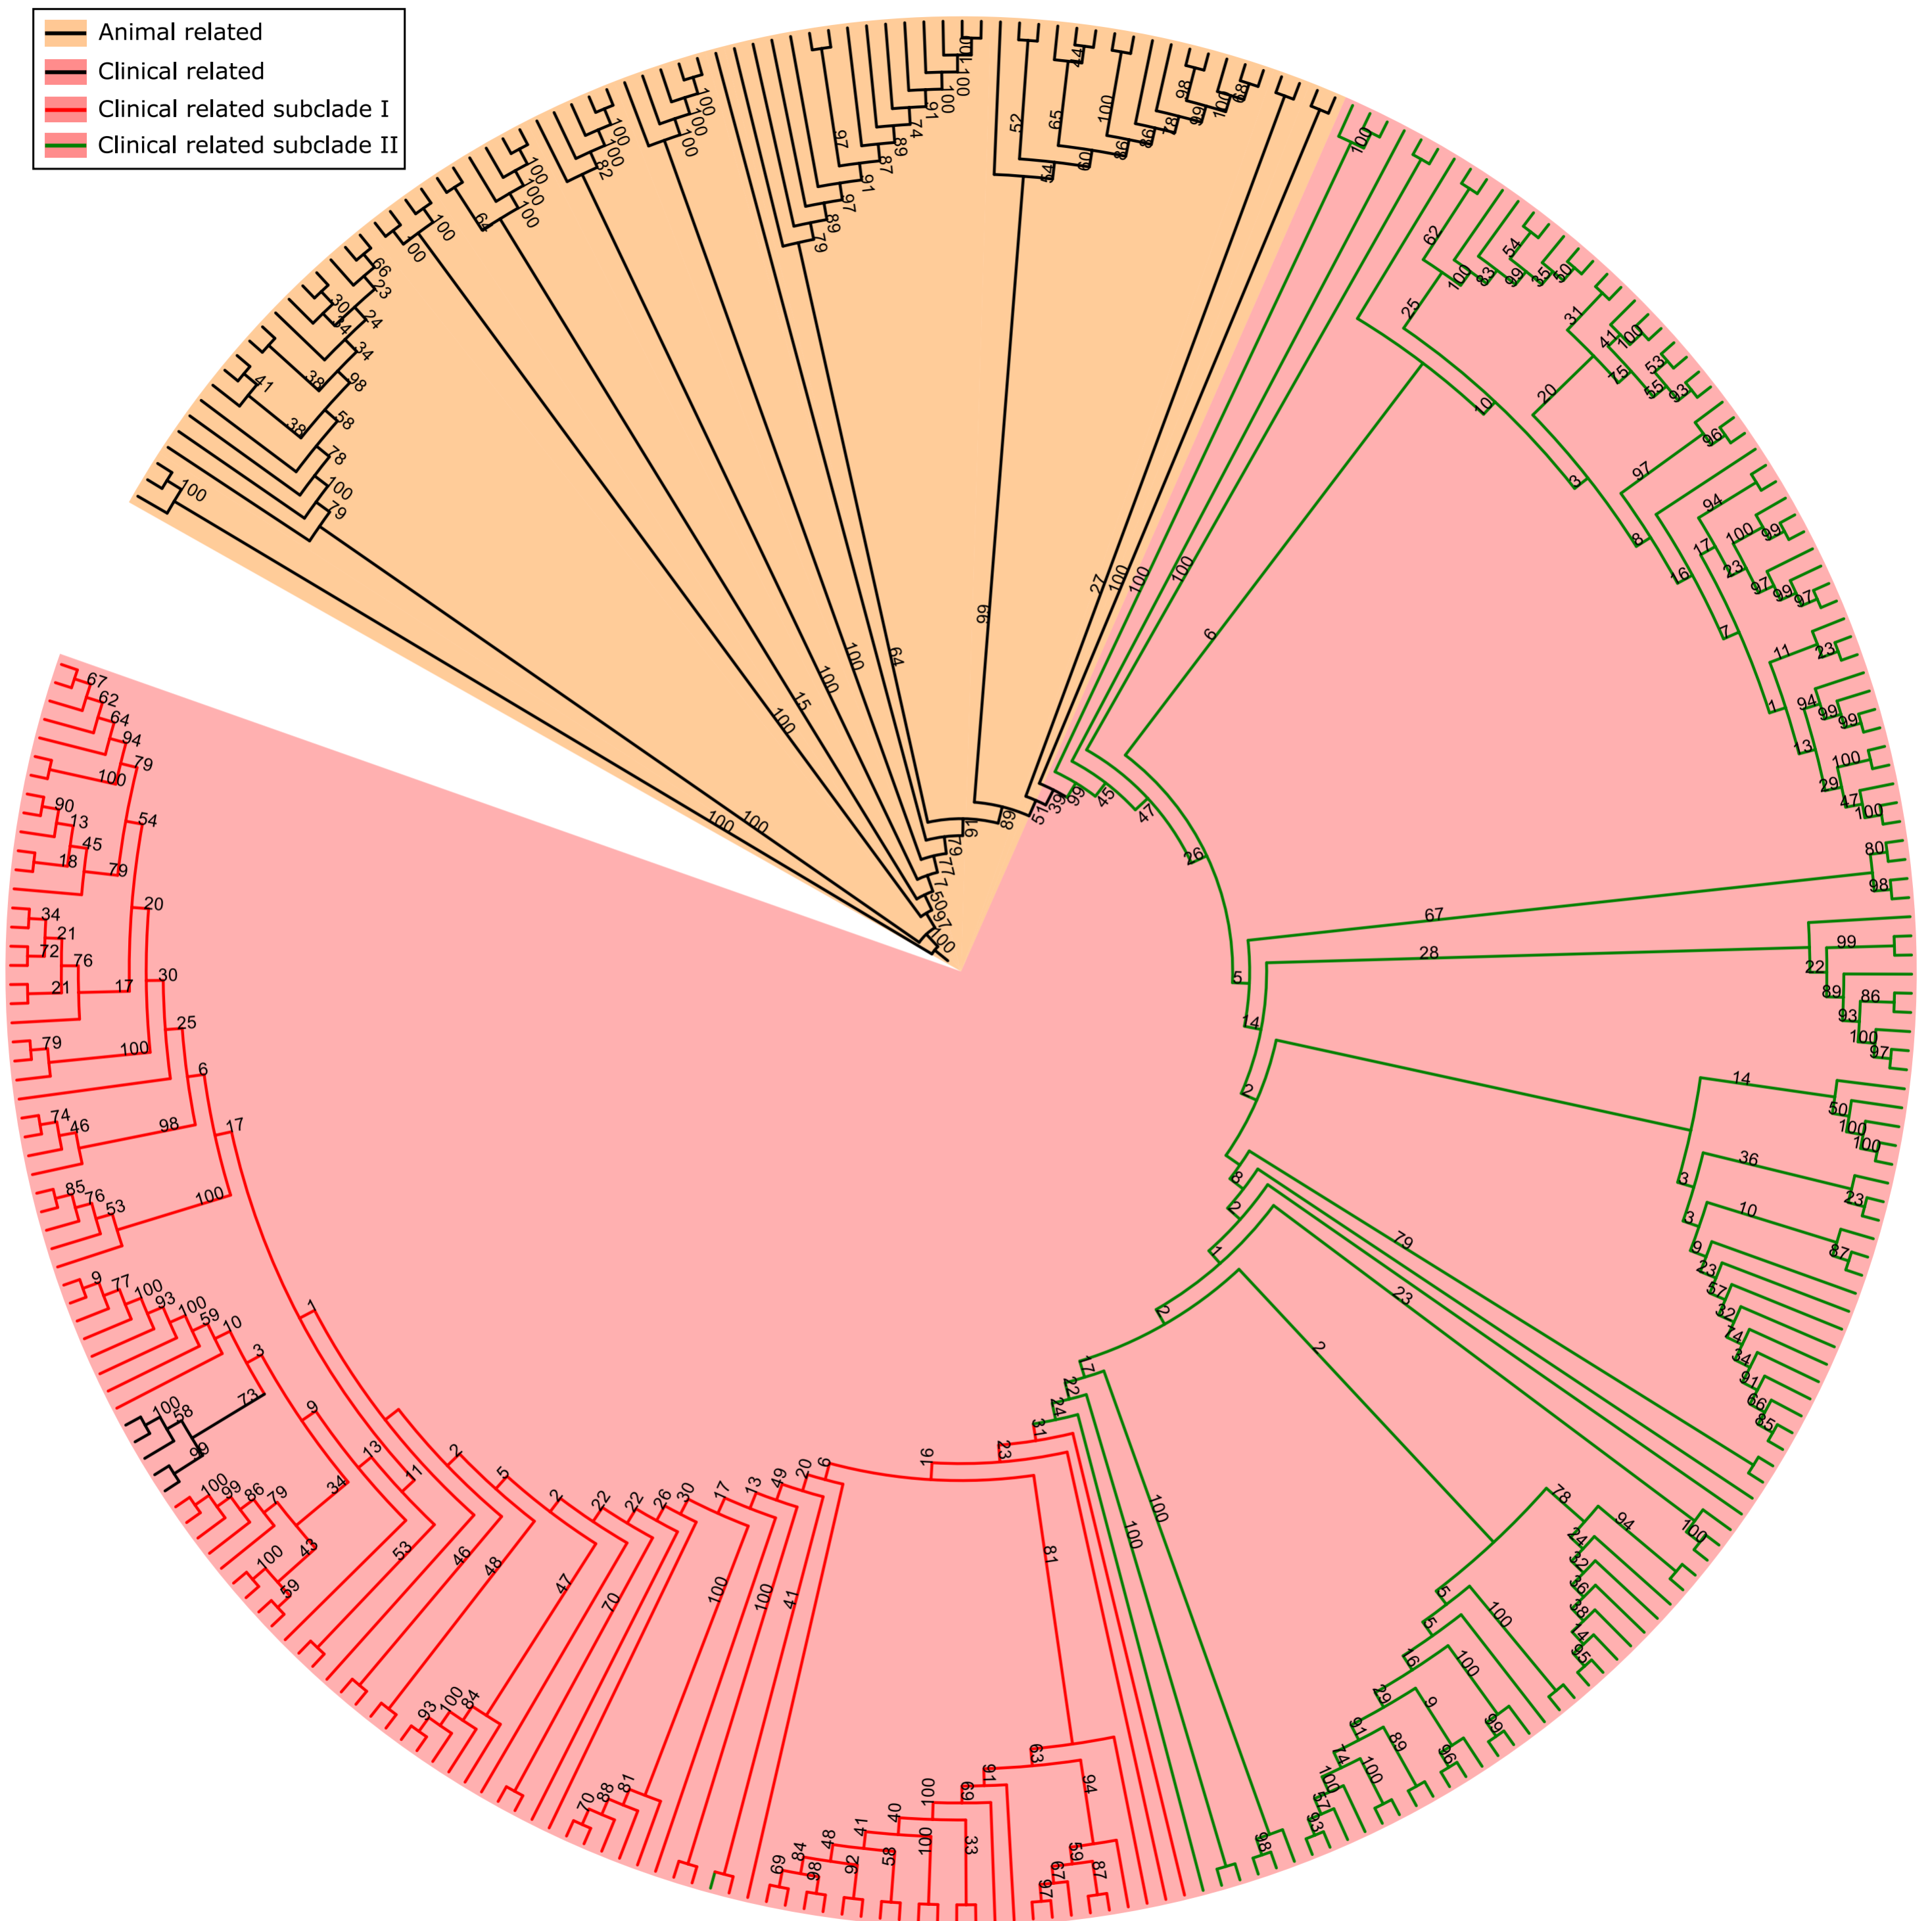

**Supplementary Figure 3.** Maximum likelihood cladogram of the non recombinant regions of the clade A. Numbers on branches represent the bootstrap support for each branch from 1000 resamplings.

No recombinant regions

MLST loci

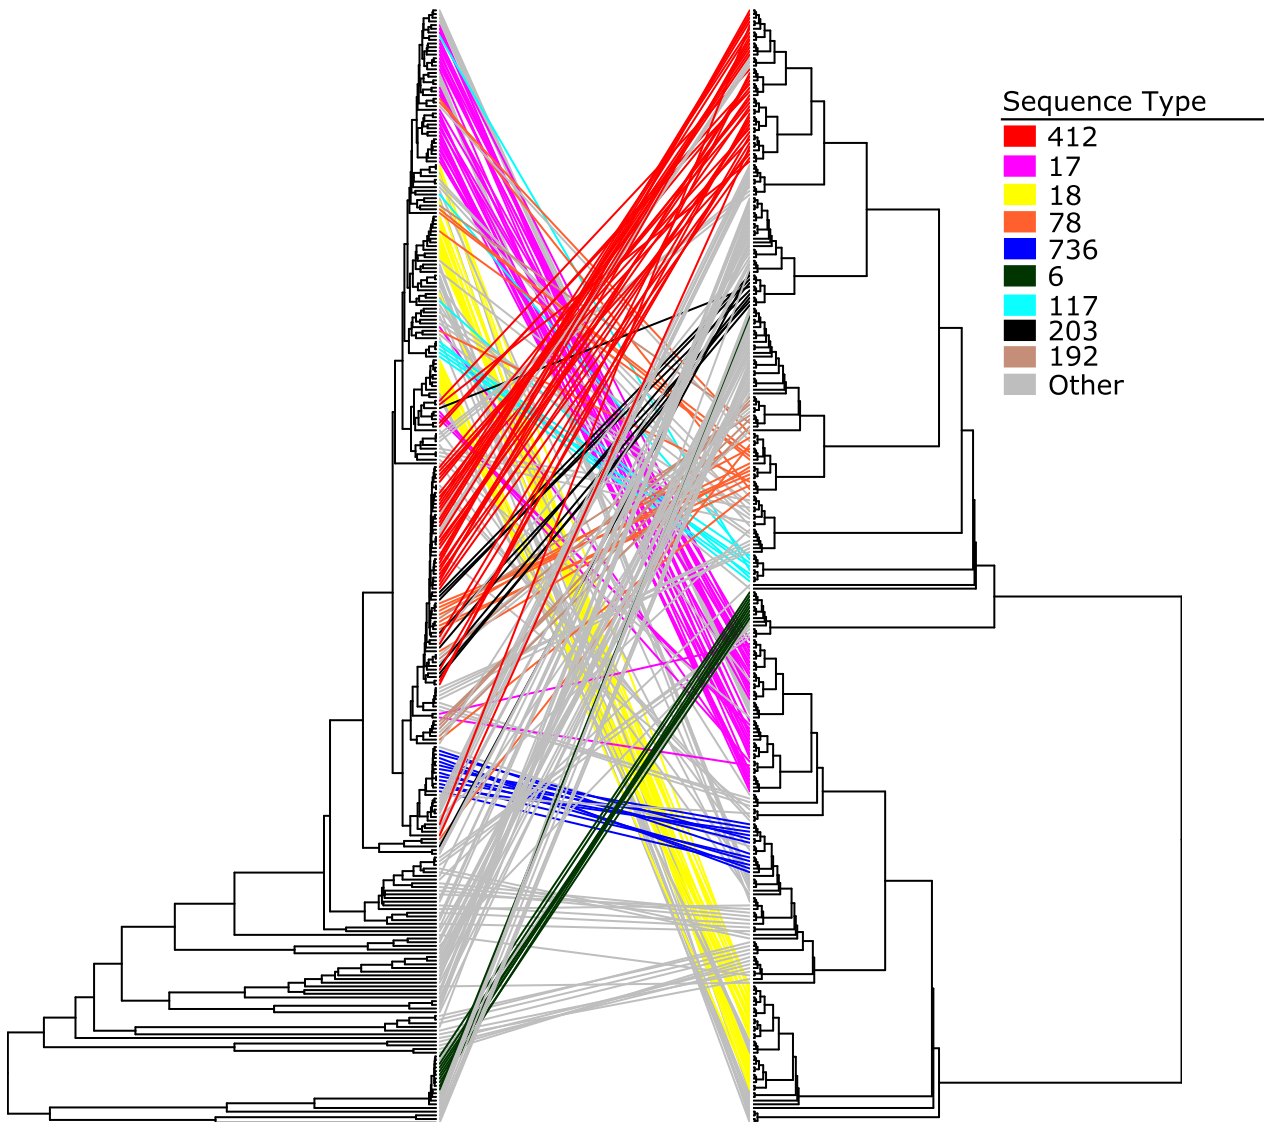

**Supplementary figure 4.** Tanglegram of phylogenetic reconstructions of Clade A genomes. Tree on the left side is based on non-recombinant regions. Tree on the right side was constructed based on MLST loci. Colored lines in the middle connect the branches from the same genome in the two trees.

- Animal related
- Clinical related
- Clinical related subclade I
- Clinical related subclade II

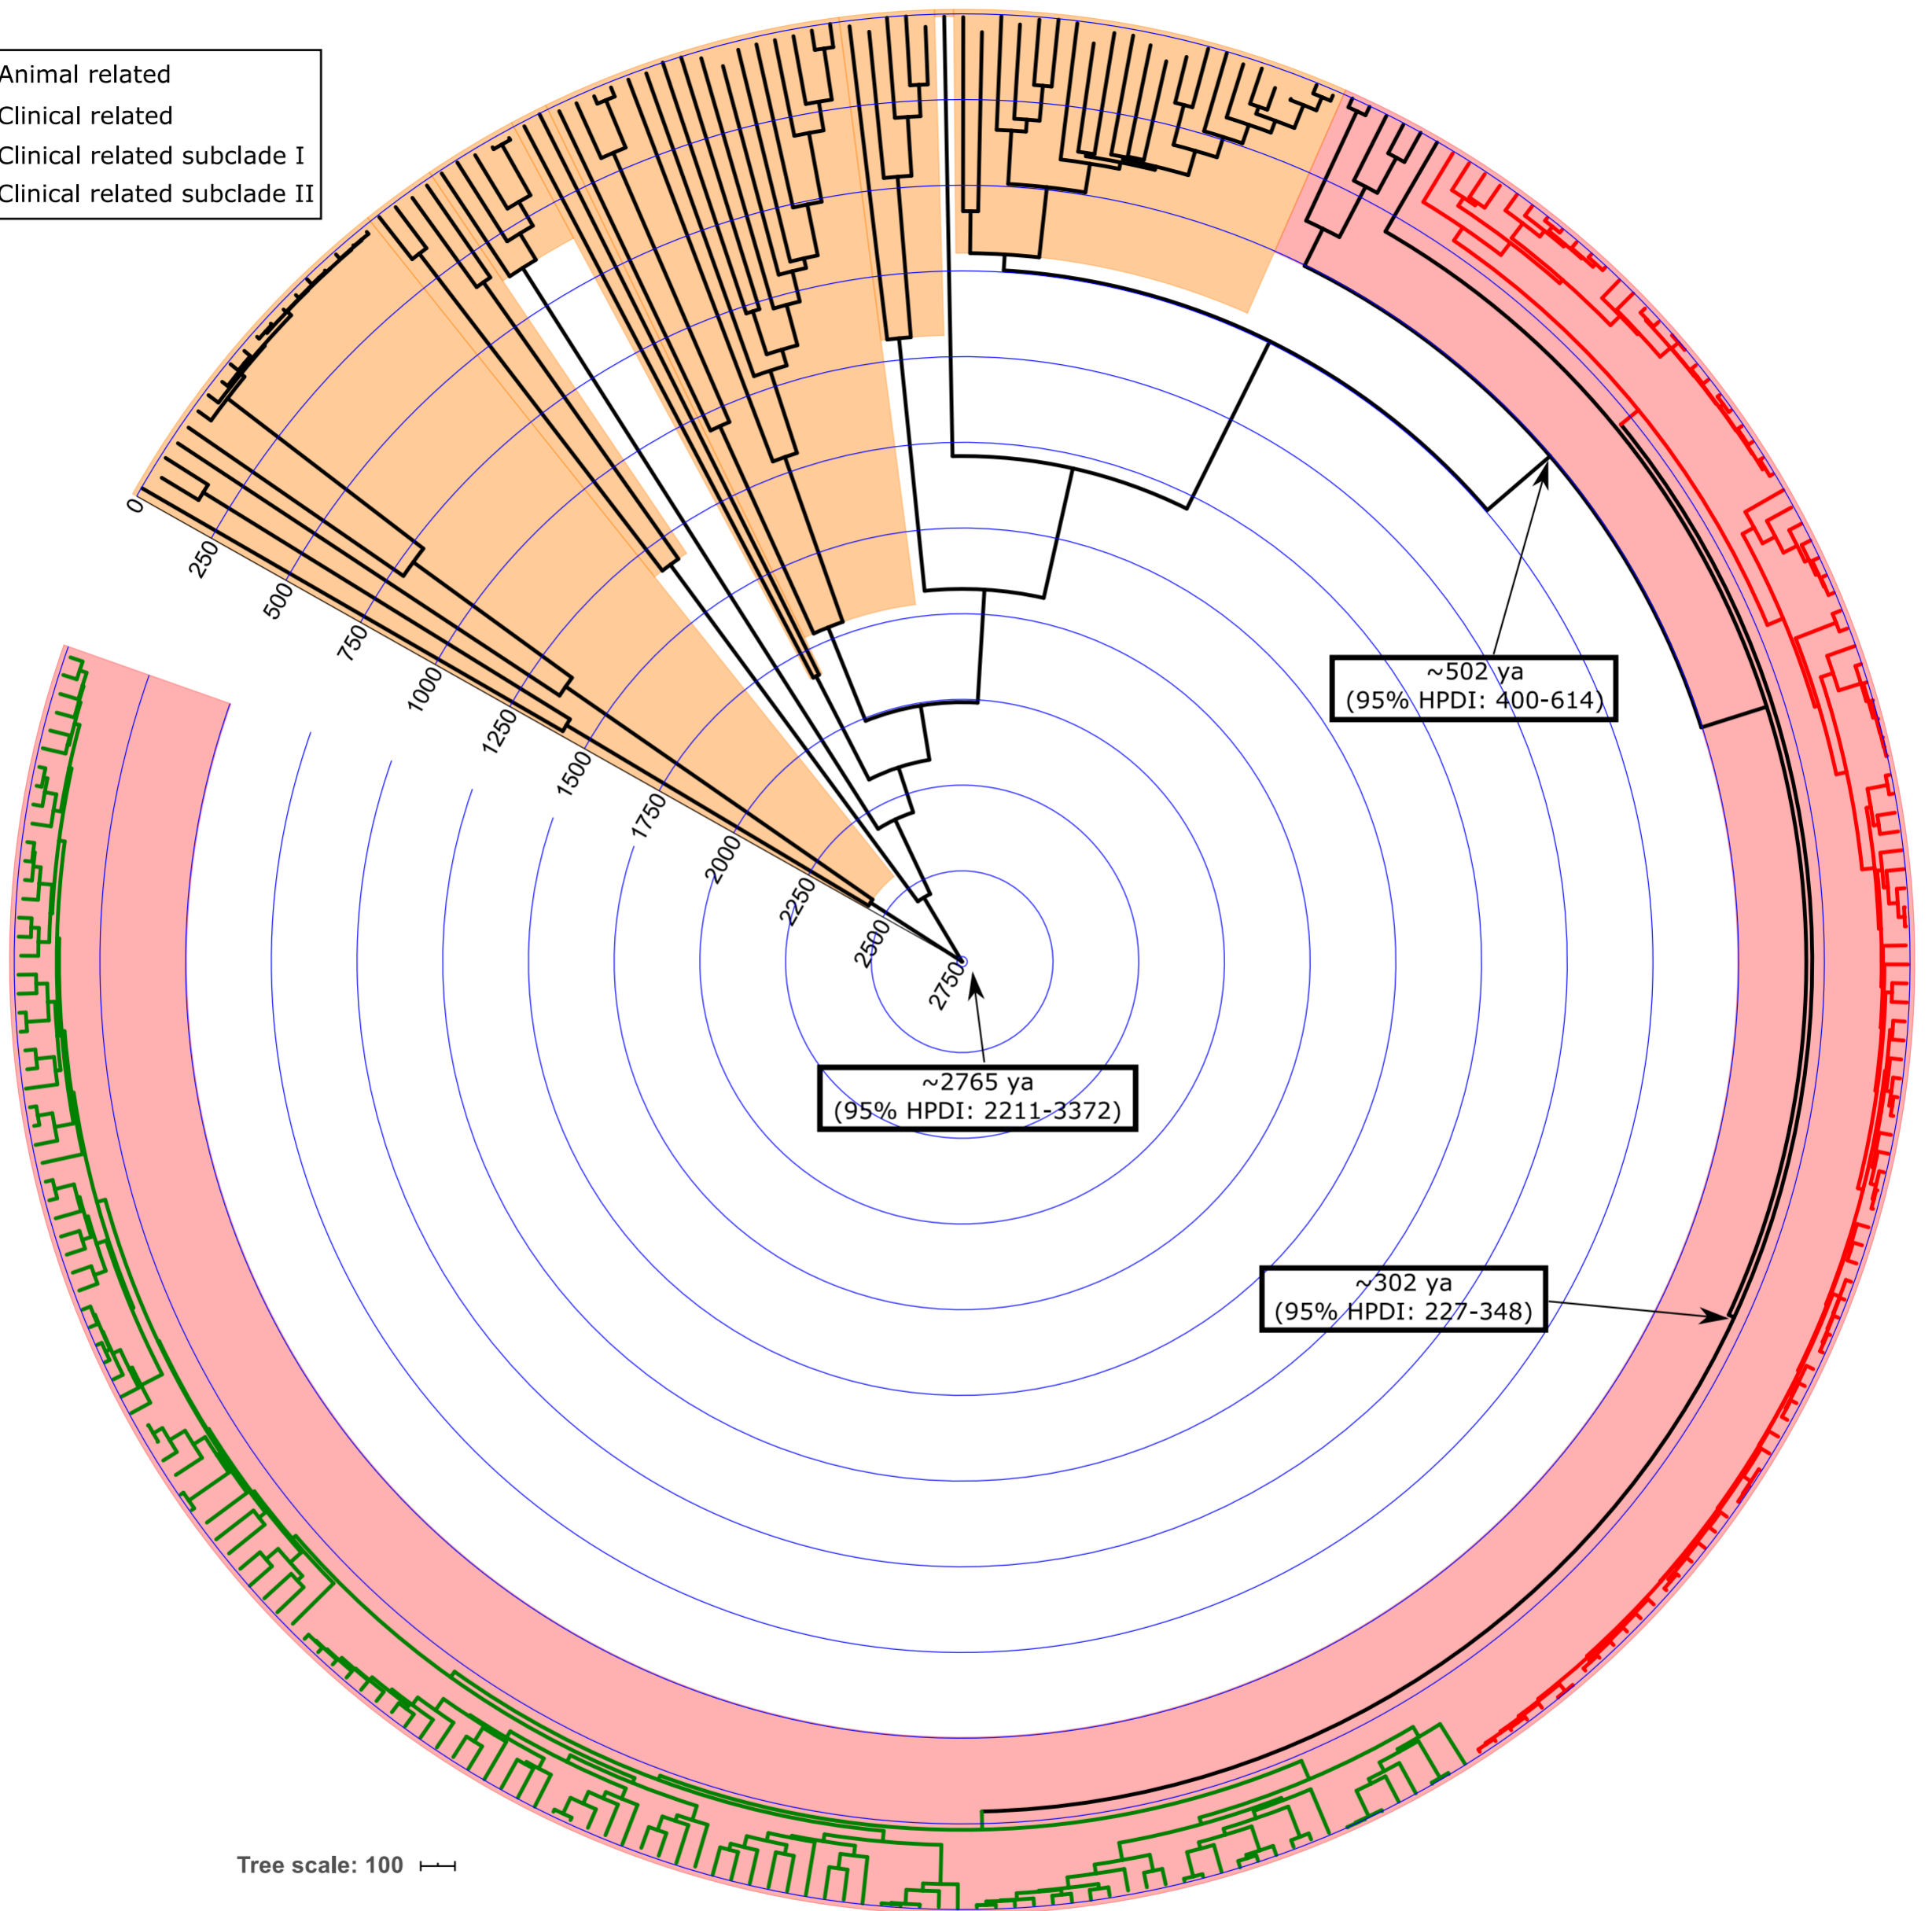

**Supplementary Figure 5.** Maximum clade credibility tree of the molecular clock analysis of clade A genomes. Each blue ring represents 250 years across branch lengths. Boxes pointing at the splits between major subclades indicate the estimated divergence time between them and their corresponding 95% high probability density intervals (HPDI).

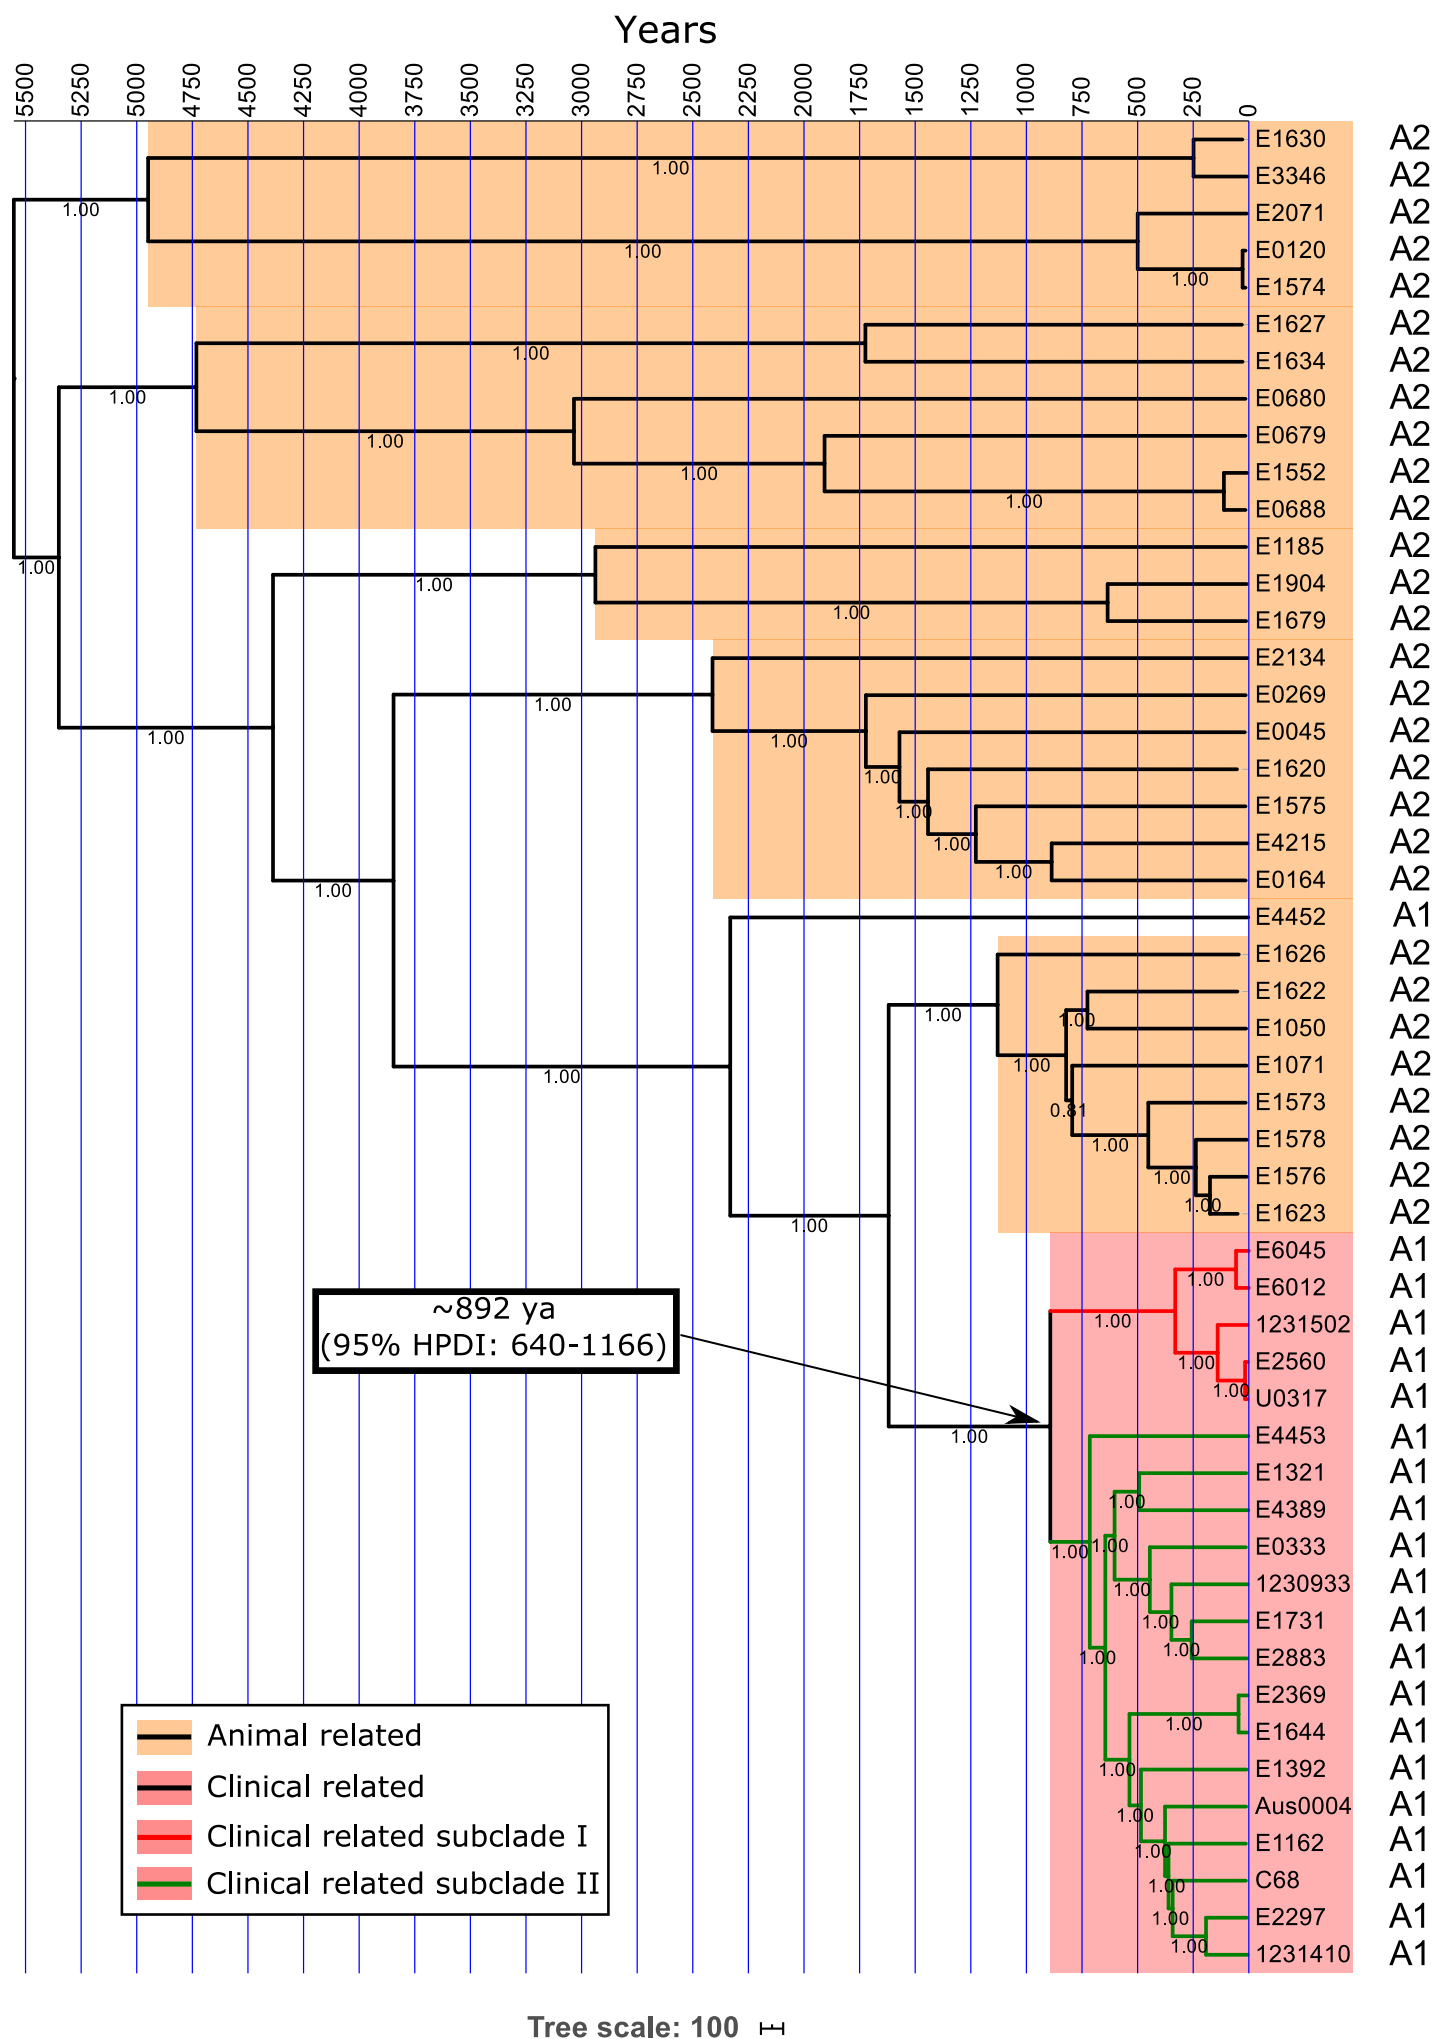

**Supplementary Figure 6.** Maximum clade credibility tree of the molecular clock of 50 genomes from Clade A (previously described by Lebreton et, al. MBio. 2013). Each blue line represents 250 years across branch lengths. Box pointing the most recent common ancestor for clinical associated isolates and their corresponding 95% high probability density intervals (HPDI). Numbers on the branches shows their posterior probabilities accordingly the Bayesian analysis.
